1 **Contrasting Effects of Western vs. Mediterranean Diets on Monocyte Inflammatory Gene**  
2 **Expression and Social Behavior in a Primate Model**

3  
4 **Authors:** Corbin S.C. Johnson<sup>1</sup>, Carol A. Shively<sup>2</sup>, Kristofer T. Michalson<sup>2</sup>, Amanda J. Lea<sup>3,4</sup>,  
5 Ryne J. DeBo<sup>2</sup>, Timothy D. Howard<sup>5</sup>, Gregory A. Hawkins<sup>5</sup>, Susan E. Appt<sup>2</sup>, Yongmei Liu<sup>6</sup>,  
6 Charles E. McCall<sup>7</sup>, David M. Herrington<sup>8</sup>, Edward H. Ip<sup>9</sup>, Thomas C. Register<sup>2†\*</sup>, Noah  
7 Snyder-Mackler<sup>1,10-14†\*</sup>

8 **Affiliations:**

9 <sup>1</sup> Department of Psychology, University of Washington, Seattle, WA 98195 (CSCJ, NSM).

10 <sup>2</sup> Department of Pathology, Section on Comparative Medicine, Wake Forest School of Medicine,  
11 Winston-Salem, NC 27101 (TCR, CAS, KTM, RJB, SEA).

12 <sup>3</sup> Lewis-Sigler Institute for Integrative Genomics, Princeton University, Princeton, NJ 08544  
13 (AJL).

14 <sup>4</sup> Department of Ecology and Evolutionary Biology, Princeton University, Princeton, NJ 08544  
15 (AJL).

16 <sup>5</sup> Department of Biochemistry, Wake Forest School of Medicine, Winston-Salem, NC 27157  
17 (TDH, GAH).

18 <sup>6</sup> Division of Cardiology, Duke University School of Medicine (YL).

19 <sup>7</sup> Department of Internal Medicine, Section of Molecular Medicine, Wake Forest School of  
20 Medicine, Winston-Salem, NC 27157 (CEM).

21 <sup>8</sup> Department of Internal Medicine, Section on Cardiovascular Medicine, Wake Forest School of  
22 Medicine, Winston-Salem, NC 27157 (DH).

23 <sup>9</sup> Department of Biostatistics, Wake Forest School of Medicine, Winston-Salem, NC 27157

24 (EHI).

25 <sup>10</sup> Center for Studies in Demography and Ecology, University of Washington, Seattle, WA 98195

26 (NSM).

27 <sup>11</sup> Department of Biology, University of Washington, Seattle, WA 98195 (NSM).

28 <sup>12</sup> Washington National Primate Research Center, University of Washington, Seattle, WA 98195

29 (NSM).

30 <sup>13</sup> School of Life Sciences, Arizona State University, Tempe, AZ 85287 (NSM).

31 <sup>14</sup> Center for Evolution & Medicine, Arizona State University, Tempe, AZ 85287 (NSM).

32 †Authors contributed equally

33 \*Correspondence: Thomas C. Register ([register@wakehealth.edu](mailto:register@wakehealth.edu)) and Noah Snyder-Mackler

34 ([nsnyderm@asu.edu](mailto:nsnyderm@asu.edu)).

35

36 **Keywords:** Western diet, Mediterranean diet, monocyte polarization, inflammatory gene

37 expression, immune regulation, differential gene co-expression, affiliative behavior, anxiety-

38 associated behavior, social isolation

39

40 **Abstract**

41 Dietary changes associated with industrialization substantially increase the prevalence of chronic  
42 diseases, such as obesity, type II diabetes, and cardiovascular disease, which are major  
43 contributors to the public health burden. The high prevalence of these chronic diseases is often  
44 attributed to an “evolutionary mismatch,” between human physiology and modern nutritional  
45 environments. In support of this idea, Western diets enriched with foods that were scarce  
46 throughout human evolutionary history (e.g., simple sugars and saturated fats) promote  
47 inflammation and disease relative to diets more akin to hunter-gatherer diets, such as a  
48 Mediterranean diet; however, the mechanisms linking dietary mismatch to inflammation and  
49 chronic disease are poorly understood. We used a macaque model and whole diet manipulations  
50 to evaluate one possible mechanism – inflammatory polarization of monocytes – that potentially  
51 leads to this evolutionary mismatch. After consuming a Western- or Mediterranean-like diet for  
52 15 months, monocytes from Western diet consumers exhibited a more proinflammatory  
53 phenotype, with 40% of their genes differentially expressed (FDR<0.05). Compared to the  
54 Mediterranean diet, the Western diet shifted the co-expression of 445 gene pairs, including small  
55 RNAs and transcription factors associated with metabolism and adiposity in humans, and  
56 dramatically altered animal behavior. For example, Western-fed individuals were more anxious  
57 and less socially integrated compared to the Mediterranean-fed subjects. These behavioral  
58 changes were also associated with some of the effects of diet on gene expression, suggesting an  
59 interaction between diet, central nervous system activity, and monocyte gene expression. The  
60 results of this study provide new insights into evolutionary mismatch at the molecular level and  
61 uncover new pathways through which Western diets generate inflammation and disease.

62

## 63 **Introduction**

64 Modern human diets vary across geography, cultures, and socioeconomic strata and have  
65 profound impacts on health, survival, and reproduction. The Western diet, prevalent in high  
66 income countries (HICs), has been long associated with adverse effects on health, particularly in  
67 relation to chronic diseases of aging (Cordain et al., 2005; Drake et al., 2018; Jacka et al., 2010;  
68 Manzel et al., 2014; Pontzer et al., 2018; Smil, 1989; Smyth & Heron, 2006). Western diets are  
69 high in simple sugars and saturated and n-6 fatty acids, which increase sympathetic nervous  
70 activity, oxidative stress, and levels of inflammatory markers (Drescher et al., 2019; Giugliano et  
71 al., 2006; Holt et al., 2009; Lopez-Garcia et al., 2004; Nanri et al., 2007; Nettleton et al., 2006).  
72 Consequently, Western diets are associated with increased risk for metabolic syndrome (Drake et  
73 al., 2018), type II diabetes (Smyth & Heron, 2006), cardiovascular disease (Drake et al., 2018;  
74 Smil, 1989), nonalcoholic hepatosteatosis (Jump et al., 2015), autoimmune disorders (Manzel et  
75 al., 2014), depression (Jacka et al., 2010), and premature death (Cordain et al., 2005). From an  
76 evolutionary perspective, the negative health effects of Western diets are hypothesized to be  
77 driven by a “mismatch” between human physiology – which evolved to subsist on a plant-based  
78 diet supplemented with fish and meat but no refined products – and the radically different  
79 nutritional environment of many human populations today (Eaton et al., 1988; Lieberman, 2014;  
80 Stearns & Koella, 2008).

81

82 In contrast to the Western diet, the Mediterranean diet derives most protein and fat from  
83 vegetable sources, which are enriched with antioxidants, monounsaturated and n-3 fatty acids.  
84 This diet more closely resembles that of modern hunter-gatherer populations and presumed  
85 ancestral human populations in macronutrient composition and key dietary components

86 (Mackenbach, 2007; Pontzer et al., 2018). Interestingly, the Mediterranean diet is also associated  
87 with an anti-inflammatory phenotype (O’Keefe et al., 2008), reduced incidence of chronic  
88 disease, and increased longevity, relative to a Western diet (Farchi et al., 1994; Osler & Schroll,  
89 1997; Romagnolo & Selmin, 2017; Trichopoulou et al., 1995). At face value, the detrimental  
90 health effects associated with Western relative to Mediterranean diets are consistent with  
91 evolutionary mismatch. However, the mechanisms through which this mismatch may negatively  
92 and causally affect health, and conversely how the Mediterranean diet positively impacts health  
93 remains poorly understood. Disentangling these mechanisms is especially difficult in humans, as  
94 population shifts toward Western diets may be accompanied by other challenges to health such  
95 as reduced physical activity or increased total caloric intake (Snodgrass, 2013; Kraft et al., 2018;  
96 Lagranja et al., 2015).

97  
98 In this study, we used a macaque model and whole diet manipulations (Western versus  
99 Mediterranean) to investigate one possible mechanism linking diet to chronic disease risk –  
100 polarization of immune cell populations toward a proinflammatory state. Previous attempts to  
101 understand how Western versus Mediterranean diets impact the immune system have relied on  
102 correlational analyses of self-reported diet or short-term dietary interventions in humans, which  
103 are limited in their ability to address causality (Stice & Durant, 2014; Suchanek et al., 2011).  
104 Many experimental manipulations have focused on single nutrients in animal models (Hu, 2002;  
105 Kimmig & Karalis, 2013; Ohlow et al., 2017; Steinhubl, 2008; Whelton et al., 1992), which  
106 cannot address the potentially important synergistic effects of the multiple nutrients that make up  
107 human diet patterns. Our study design circumvents these challenges to address the role that a  
108 major inflammatory cell type - monocytes - plays in sensing and responding to dietary inputs

109 (Devêvre et al., 2015; Drescher et al., 2019; Holt et al., 2009; Nanri et al., 2007; Nettleton et al.,  
110 2006). Monocytes and monocyte-derived macrophages are innate immune cells that vary  
111 phenotypically along a spectrum, which ranges broadly from proinflammatory (M1-like) to  
112 regulatory/reparative (M2-like). An appropriate balance of these monocyte phenotypes is  
113 essential for a healthy immune system. Classically-activated M1 monocytes respond to  
114 proinflammatory cytokines such as tumor necrosis factor (TNF)- $\alpha$  and interferon (IFN)- $\gamma$  by  
115 becoming macrophages, which propagate the inflammatory response towards infection (Mosser  
116 & Edwards, 2008). In contrast, M2 activated monocytes mobilize the tissue repair processes and  
117 release anti-inflammatory cytokines in response to IL-4, IL-13, and transforming growth factor  
118 (TGF)- $\beta$  (Mosser & Edwards, 2008). Thus, dietary constituents or patterns may influence  
119 pathologic processes by altering the balance between these proinflammatory and anti-  
120 inflammatory monocyte subsets – a hypothesis that has yet to be tested (Devêvre et al., 2015).  
121  
122 In addition to diet, psychosocial stress is also known to impact immune phenotypes. In  
123 particular, multiple sources of social adversity, such as low social status and poor social  
124 integration, have been shown to increase the expression of inflammatory genes in primary white  
125 blood cells in humans and other animals (Cole, 2013, 2019; Cole et al., 2015; Snyder-Mackler et  
126 al., 2016; Snyder-Mackler & Lea, 2018; Tung & Gilad, 2013). Given that some food constituents  
127 can directly alter social behaviors themselves (Hollis et al., 2018; Kaplan et al., 1991;  
128 Kasprowska-Liškiewicz et al., 2017; Kougias et al., 2018; Warden & Fisler, 2008), it is therefore  
129 possible that diet effects on immune cell regulation may, to some degree, be mediated through  
130 changes in these behaviors. It is also possible that diet-induced alterations in systemic  
131 inflammation may alter behavior. However, because no detailed studies of diet, social behavior,

132 and immune cell phenotypes have been conducted, it remains unclear how these factors are  
133 linked and how, together, they impact health. To address these gaps, we conducted a whole-diet  
134 manipulation to directly and simultaneously compare the behavioral and physiological effects of  
135 Mediterranean and Western diets, formulated to mimic human diet patterns, in a randomized,  
136 preclinical, nonhuman primate trial. The randomized trial design allowed us to identify causal  
137 effects of realistic, complex diet patterns. Previous reports from this preclinical trial demonstrate  
138 that relative to the Mediterranean diet, the Western diet increased body weight, body fat, insulin  
139 resistance, and hepatosteatosis (Shively et al., 2019); exacerbated autonomic and hypothalamic-  
140 pituitary-adrenal responses to psychosocial stress (Shively et al., 2020); and altered brain  
141 neuroanatomy (Frye et al., 2020). Here, we report the effects of the Mediterranean and Western  
142 diet patterns on behavior and monocyte gene expression.

143

## 144 **Results**

### 145 *Diet intervention*

146 Adult female cynomolgus macaques were fed either a Western-like (hereafter, “Western”) or a  
147 Mediterranean-like (hereafter, “Mediterranean”) diet for 15 months (approximately equivalent to  
148 4 human years). The experimental diets were formulated to model human diet patterns and have  
149 been previously described (Shively et al., 2019). Briefly, the Western diet was designed to mimic  
150 the diet typically consumed by middle-aged Americans (Centers for Disease Control and  
151 Prevention [CDC], 2014), whereas the Mediterranean diet reflected key aspects of the human  
152 Mediterranean diet (Kafatos et al., 2000). The experimental diets were matched on  
153 macronutrients and cholesterol content but differed in fatty acids. Fats and proteins were mostly  
154 plant based in the Mediterranean diet (Kafatos et al., 2000), and from animal sources in the

155 Western diet. This resulted in high levels of monounsaturated fats in the Mediterranean diet, and  
156 saturated fats in the Western diet (Cordain et al., 2005; Kafatos et al., 2000). The Mediterranean  
157 diet was higher in complex carbohydrates and fiber, and had a lower n-6:n-3 fatty acid ratio  
158 (similar to a traditional hunter-gatherer type diet (Cordain et al., 2005)), and lower sodium and  
159 refined sugars than the Western diet. Key Mediterranean ingredients included English walnut  
160 powder and extra-virgin olive oil which were the primary components provided to participants in  
161 the PREDIMED trial (Estruch et al., 2018). Macronutrient composition of experimental diets  
162 compared to monkey chow and human diet patterns can be found in Table 1, Methods.

163

#### 164 *Diet induced major shifts in monocyte gene expression*

165 RNA sequencing was employed to measure genome-wide gene expression of purified CD14+  
166 monocytes after 15 months on the experimental diets. Diet had a strong effect on monocyte gene  
167 expression: the first principal component of gene expression, which explained 59.2% variance,  
168 was significantly associated with diet ( $t_{(25.1)} = 4.41$ ,  $p = 1.7 \times 10^{-4}$ ; Fig. 1A). PC1 score was  
169 correlated with expression of known proinflammatory genes such as *IL6* (Pearson's  $r = 0.77$ ,  $p =$   
170  $5.4 \times 10^{-8}$ ), *IL1A* (Pearson's  $r = 0.69$ ,  $p = 4.3 \times 10^{-6}$ ), *NFKB1* (Pearson's  $r = 0.61$ ,  $p = 1.2 \times 10^{-4}$ ),  
171 and *NFKB2* (Pearson's  $r = 0.72$ ,  $p = 1.3 \times 10^{-6}$ ). Approximately 40% of the 12,240 expressed  
172 genes were significantly differentially expressed genes (DEGs) between the two diets ( $n = 4,900$   
173 genes,  $FDR < 0.05$ ; for all detected genes and the effect size of diet, see Table S1A; for DEGs  
174 sorted by the effect size of diet, see Table S1B). The number of diet-responsive genes was  
175 roughly balanced between those that were more highly expressed in monkeys fed the  
176 Mediterranean diet ( $n = 2,664$ ; hereafter “Mediterranean genes”) and those that were more highly  
177 expressed in monkeys fed the Western diet ( $n = 2,236$ ; hereafter “Western genes”). While



178 balanced in direction, the effect sizes of diet in Western genes were, on average, 1.6-fold larger  
179 than in Mediterranean genes (Mann-Whitney  $U = 4.1 \times 10^6$ ,  $p = 6.1 \times 10^{-117}$ ; Fig. 1B). Thus, the  
180 strongest effects were observed in genes that were either activated by a Western diet or  
181 suppressed by a Mediterranean diet.  
182

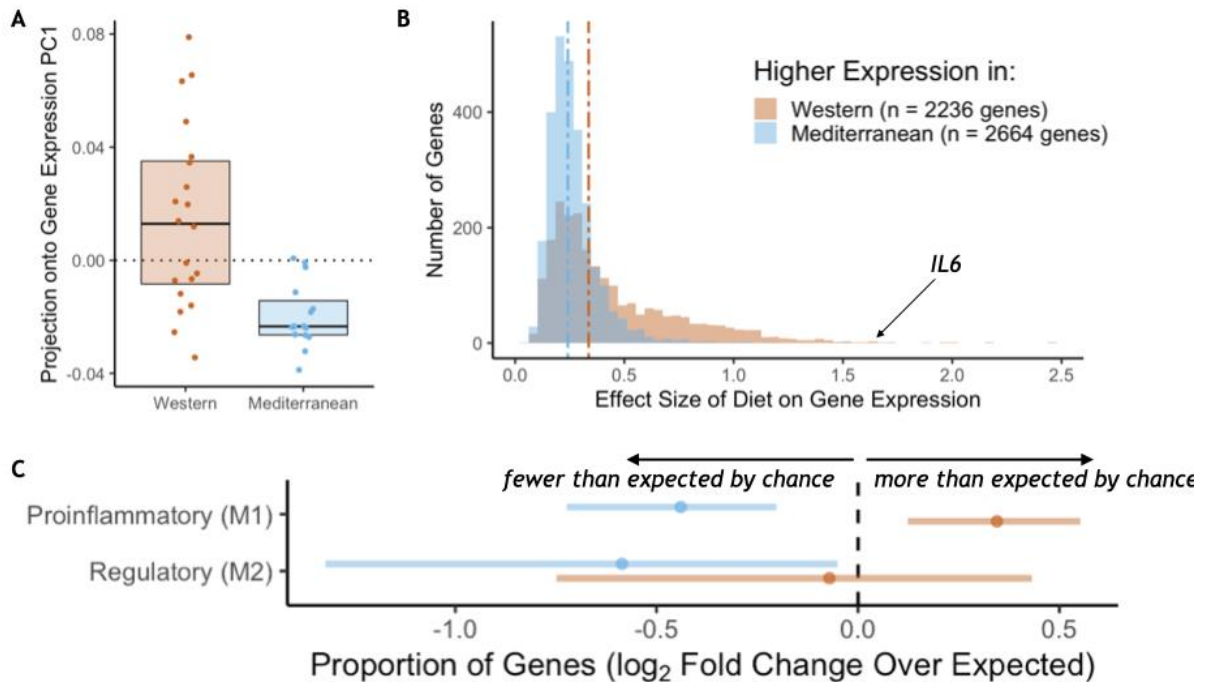

**Figure 1. Diet effects on monocyte gene expression.** **A)** Diet was significantly associated with the first principal component of gene expression (59.3% variance explained,  $t_{(25,0)} = 4.41$ ,  $p = 1.72 \times 10^{-4}$ ). **B)** The average effect size of diet on Western genes was 60% stronger than the effect size of diet on Mediterranean genes (Mann-Whitney  $U = 4.1 \times 10^6$ ,  $p = 6.1 \times 10^{-117}$ ). **C)** Western genes (orange) contained more M1 genes than expected by chance, indicating that the Western diet induced a shift towards a proinflammatory monocyte phenotype. Western genes were enriched for proinflammatory (M1-like) genes (fold-enrichment = 1.27, 95% CI = 1.09, 1.46), while Mediterranean genes (blue) were depleted of these same M1-like genes (fold-enrichment = 0.74, 95% CI = 0.61, 0.88). Regulatory (M2-like) genes were also under-represented in Mediterranean genes (fold-enrichment = 0.67, 95% CI = 0.40, 0.97), but not in Western genes (fold-enrichment = 0.95, 95% CI = 0.60, 1.35).

183

184 Monocytes from animals fed the Western diet had higher expression of a number of well-known  
185 inflammatory-related genes, including interleukin-6 ( $\beta_{\text{diet}} = 1.66$ , FDR =  $8.9 \times 10^{-3}$ ; Fig. 1B),  
186 interleukin-1 $\alpha$  ( $\beta_{\text{diet}} = 1.22$ , FDR = 0.033), and two subunits of the NF- $\kappa$ B protein (*NFKB1*  $\beta_{\text{diet}} =$   
187 0.30, FDR = 0.017; *NFKB2*  $\beta_{\text{diet}} = 0.42$ , FDR = 0.012). Western genes were more likely to be  
188 involved in replication and metabolic cellular processes, including response to growth factor  
189 (GO:0070848, weighted Fisher's Exact Test (FET)  $p = 4.6 \times 10^{-3}$ ) and response to insulin  
190 (GO:0032868, weighted FET  $p = 4.0 \times 10^{-4}$ ; for all GO terms enriched in Western genes, see  
191 Table S2A), suggesting that the Western diet also reprogrammed oxidative metabolic aspects of  
192 monocyte gene regulation. Conversely, Mediterranean diet monocyte expression patterns were  
193 involved in enhanced oxidation-reduction processes (GO:0055114, weighted FET  $p = 6.0 \times 10^{-3}$ ;  
194 for all GO terms enriched in Mediterranean genes, see Table S2B), a critical function in keeping  
195 proinflammatory monocytes in check.

196

197 We next conducted a more targeted analysis of monocyte polarization by focusing on genes  
198 previously shown to be differentially expressed between induced proinflammatory (M1) and  
199 regulatory (M2) monocytes (Schmidl et al., 2014) (see Table S1 for polarization categories).  
200 Western genes contained more M1-associated genes than expected by chance ( $n = 162$  genes,  
201 fold-enrichment = 1.27, 95% CI = 1.09 - 1.46; Fig. 1C), but not M2-associated genes ( $n = 24$   
202 genes, fold-enrichment = 0.95, 95% CI = 0.60 - 1.35). Conversely, both M1-associated genes ( $n$   
203 = 112 genes, fold-enrichment = 0.74, 95% CI = 0.61 - 0.88) and M2-associated genes ( $n = 20$   
204 genes, fold-enrichment = 0.67, 95% CI = 0.40 - 0.97) were underrepresented among  
205 Mediterranean genes.

206

207 To identify putative upstream gene regulatory mechanisms, we examined whether DEGs were  
208 associated with predicted *cis*-regulatory transcription factor binding sites. We identified 34  
209 distinct transcription factor-binding motifs enriched within 2 kilobases of the transcription start  
210 sites of Mediterranean genes and one that was enriched near the transcription start sites of  
211 Western genes (FDR < 0.05; Fig. 2, for all transcription factor binding motifs enriched in the  
212 regulatory regions of either set of diet genes, see Table S3). Diet altered expression of the genes  
213 encoding for seven of these 35 transcription factors, including *IRF3*, *IRF8*, *MEF2C*, and *SP1*,  
214 which drive monocyte fate and polarization in response to extracellular signals (Chistiakov et al.,  
215 2018; Günthner & Anders, 2013; Schuler et al., 2008; Scott et al., 1994; Zhang et al., 1994).  
216 Thus, some of the diet-associated changes in monocyte transcriptional profiles may be mediated  
217 by changes in the expression and *cis*-regulatory binding of these key transcription factors.  
218

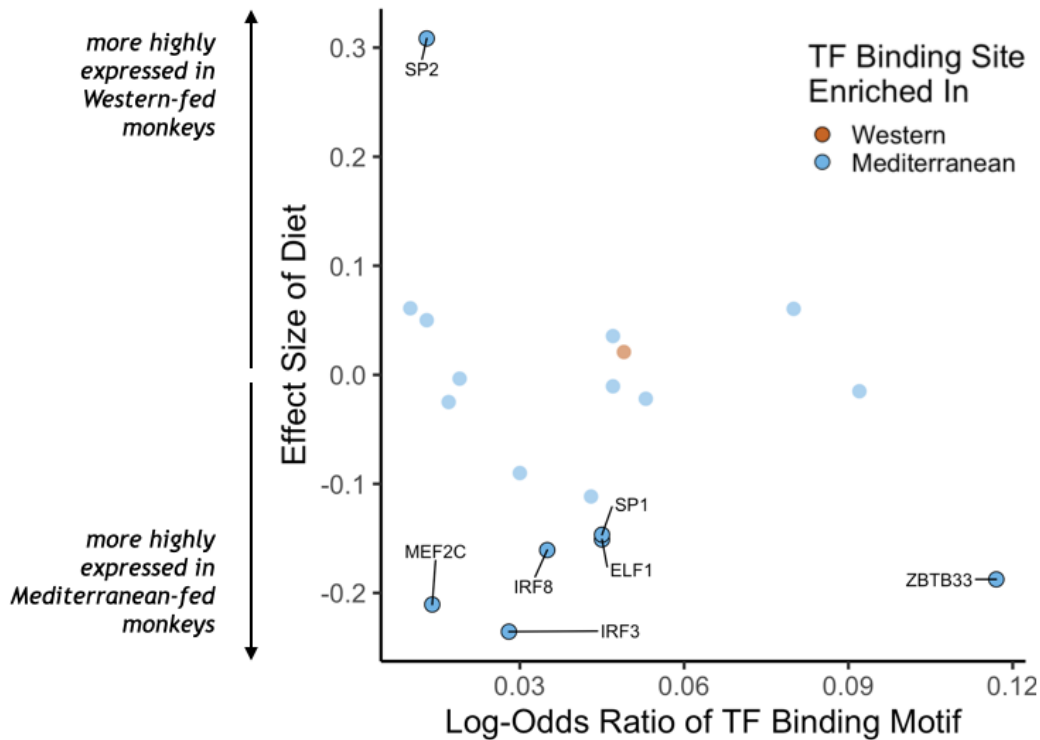

**Figure 2. Transcription factor (TF) binding motifs correlated with diet effects on gene expression.** The log-odds ratio of TF binding motif enrichment in Western genes (orange) or Mediterranean genes (blue) are depicted on the x-axis. The y-axis shows the effect size of diet on the expression of the gene that encodes for the TF. Only TFs with binding motifs significantly enriched in either gene set and that were detectably expressed in our samples are shown, with those significantly affected by diet ( $FDR < 0.05$ ) outlined and labeled.

219

220 *Diet differentially influenced gene co-expression patterns*

221 The effects of diet on the magnitude and direction of pairwise gene expression correlations were  
222 assessed for the most strongly diet-affected genes, as such effects could reveal key gene  
223 regulatory networks that are altered by diet, that may themselves be regulated by key upstream  
224 targets (de la Fuente, 2010; Gaiteri et al., 2014). To reduce the number of tests, we limited our  
225 analyses to the pairwise combinations of the top 140 DEGs ( $n = 9730$  combinations). Of these  
226 gene pairs, many were significantly associated with each other in both diets, both positively ( $n =$   
227 714) and negatively ( $n = 332, p < 0.05$ ; for all gene pairs tested and their correlations, see Table  
228 S4A), suggesting that while diet altered expression of these genes, it did not change their co-  
229 expression relationships. Drawing on a newly developed approach, “correlation by individual  
230 level product” (CILP) (Lea et al., 2019), we identified 445 other gene pairs that exhibited  
231 significant differences ( $FDR < 0.2$ ) in their correlation between the Mediterranean- and Western-  
232 fed monkeys (Table S4A; Fig. 3A), suggesting that one of the experimental diets altered the  
233 coherence between the genes (Fig. 3A).

234

235 We also identified 16 “hub” genes that exhibited differential correlations with more partner  
236 genes than expected by chance (Fig. 3B, for all genes included in one or more differentially  
237 correlated gene pairs, see Table S4B). These hub genes were enriched for genes encoding

238 transcription factors (OR = 7.40, FET  $p = 7.0 \times 10^{-3}$ ), including *SOX4* (essential for normal  
239 insulin secretion and glucose tolerance) and *NR4A2* (involved in lipid, carbohydrate, and energy  
240 metabolism (Goldsworthy et al., 2008; Pearen & Muscat, 2010)), providing further support for  
241 immunological and metabolic reprogramming induced by our diet manipulation. Interestingly,  
242 the hub gene involved in the greatest number of differentially-correlated gene pairs was  
243 *RF00283*, aka *SCARNA18*, a non-coding RNA that has been associated with BMI, HDL  
244 cholesterol, and aging in human genome-wide association studies (Davis et al., 2017; Dluzen et  
245 al., 2018; Kanai et al., 2018; Tachmazidou et al., 2017) (Fig. 3B-D). This small nucleolar RNA is  
246 thus a key transcriptional regulator that is altered by diet and has a cascading effect on other  
247 genes and pathways.  
248

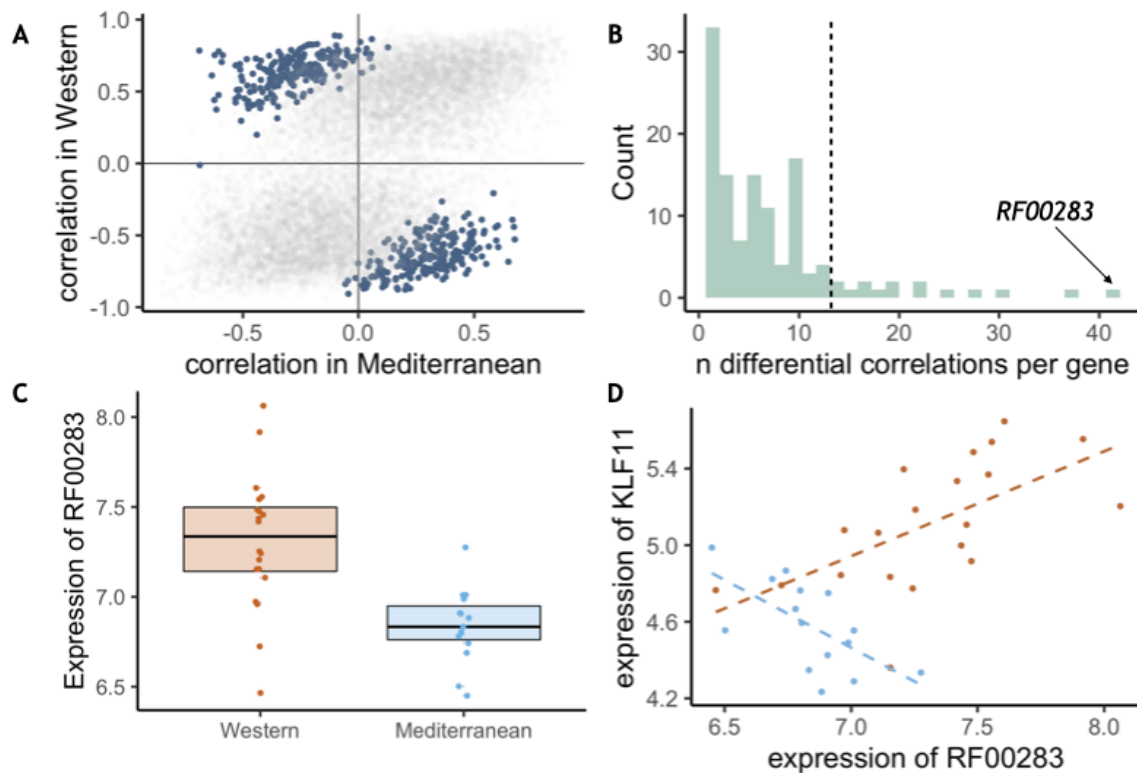

**Figure 3. Diet altered monocyte gene co-expression.** A) The Pearson correlation between each pair of genes

within each of the experimental diets. Gene pairs that were significantly differently correlated between diets are highlighted in blue ( $n = 445$  significant pairs,  $FDR < 0.2$ ). **B**) Of the genes involved in significant pairs, some were paired with more genes than expected by chance, called “hub” genes ( $n = 16$  hub genes; dotted black line is the maximum number of significant pairs expected by chance). The strongest hub gene was the non-coding RNA *RF00283*. **C**) Residual normalized expression of *RF00283* is significantly greater in Western- than Mediterranean-fed monkeys ( $\beta_{diet} = 0.507$ ,  $FDR = 2.3 \times 10^{-6}$ ). **D**) Example of a differential correlation involving *RF00283*. Residual normalized expression of *RF00283* is plotted against expression of *KLF11*, a differentially-expressed transcription factor that regulates insulin and has been associated with type II diabetes in humans (Neve et al., 2005). The two genes were more highly expressed in Western monocytes, were positively correlated with one another in Western-fed monkeys (Pearson’s  $r = 0.61$ ,  $p = 4.2 \times 10^{-3}$ ), were negatively correlated in Mediterranean-fed monkeys (Pearson’s  $r = -0.63$ ,  $p = 0.011$ ), and were differentially correlated between the two diets ( $p = 4.1 \times 10^{-5}$ ,  $FDR = 0.11$ ).

249

#### 250 *Diet altered social and affective behavior*

251 There were no significant differences in behavior between assigned diet groups during the  
252 baseline phase while consuming chow (Fig. S1A, B). However, after 15 months on experimental  
253 diets, the two diet groups differed significantly in behavior. The Mediterranean group spent more  
254 time in body contact (Mann-Whitney  $U = 284$ , Holm-Bonferroni-adjusted  $p = 1.1 \times 10^{-5}$ ) and  
255 resting ( $U = 269$ , Holm-Bonferroni-adjusted  $p = 1.6 \times 10^{-3}$ ), while those fed the Western diet  
256 spent more time alone ( $U = 255$ , Holm-Bonferroni-adjusted  $p = 4.9 \times 10^{-3}$  Fig. 4A; see Fig. S1C,  
257 D for behaviors during experimental diet consumption).

258

259 Principal component analysis was conducted to identify key behaviors associated with one  
260 another (Benito et al., 2018; Seltmann et al., 2018). Behaviors associated with dominance  
261 interactions—including aggression, submission, and being groomed—all loaded heavily onto the

262 first principal component, which explained 32.4% of the overall variance in behavior and did not  
263 differ between diets (Welch-Satterthwaite  $t_{(30.4)} = -0.388$ ,  $p = 0.70$ ; for relationship between  
264 dominance rank and PC1, see Fig. S2; for further discussion of social status in these animals, see  
265 Note S1; Fig. 6A, B).

266

267 The second principal component, which explained 19.2% of the variance in behavior, differed  
268 significantly between the two diets ( $t_{(26.8)} = 4.13$ ,  $p = 3.2 \times 10^{-4}$ ; Fig. 4B). No other principal  
269 component was significantly correlated with diet, thus PC2 represented a composite of diet-  
270 altered behaviors (Fig. 4C; hereafter, DAB). DAB captured socially relevant behaviors.

271 Specifically, percent of time spent in body contact, indicative of social integration, was  
272 positively correlated with an individual's PC2 score (Pearson's  $r = 0.89$ , Holm-Bonferroni-  
273 adjusted  $p = 1.0 \times 10^{-11}$ ; hereafter, DAB score), and higher in Mediterranean-fed animals.

274 Conversely, percent of time spent alone was associated with lower DAB scores (Pearson's  $r = -$   
275  $0.85$ , Holm-Bonferroni-adjusted  $p = 3.0 \times 10^{-9}$ ), and was higher in animals fed the Western diet  
276 (Fig. 4D). Previous work has validated a behavioral index of anxiety in nonhuman primates (rate  
277 of self-grooming and scratching) (Coleman et al., 2011; Maestripietri et al., 1992; Schino et al.,  
278 1996; Shively et al., 2015; Troisi et al., 2000; Troisi, 2002), which loaded heavily onto PC2 and  
279 is significantly negatively correlated with DAB score (Pearson's  $r = -0.53$ , Holm-Bonferroni-  
280 adjusted  $p = 0.019$ ). Thus, PC2 (DAB) captured a measure of social integration associated with  
281 consuming a Mediterranean-like diet, and social isolation and anxiety associated with consuming  
282 a Western-like diet.

283

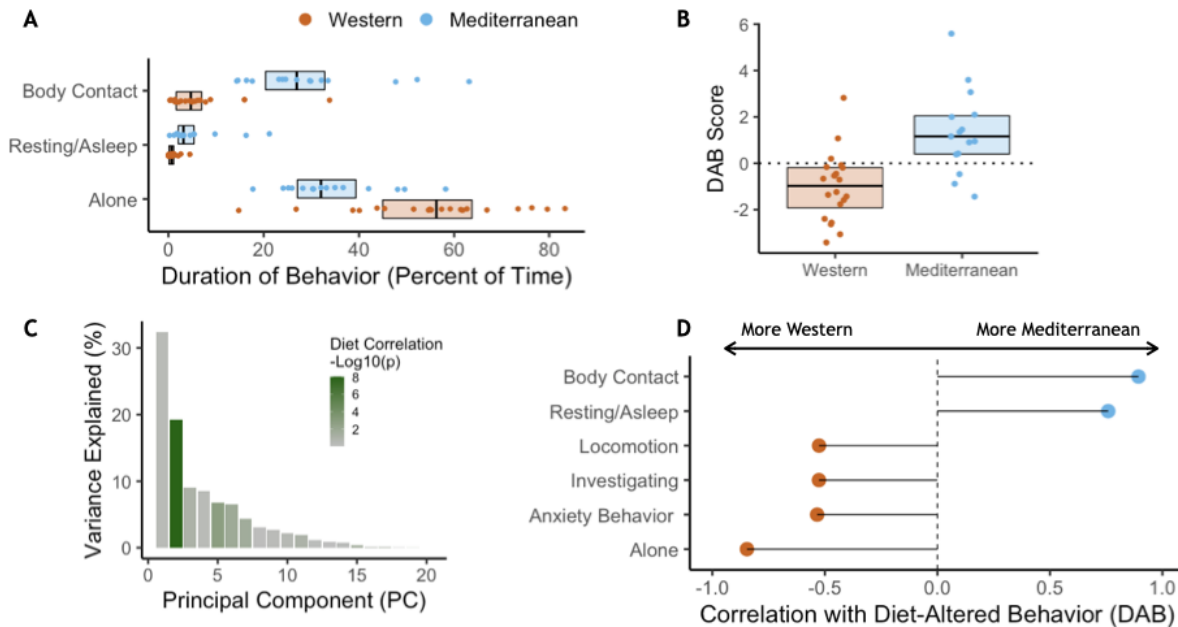

**Figure 4. Diet alters behavioral phenotype.** **A)** Three behaviors were significantly different between the two diet groups. Monkeys fed the Mediterranean diet spent more time in body contact (Holm-Bonferroni adjusted  $p = 1.1 \times 10^{-5}$ ) and resting (Holm-Bonferroni adjusted  $p = 1.6 \times 10^{-3}$ ) than Western-fed monkeys. Monkeys eating the Western diet spent more time alone than Mediterranean-fed monkeys (Holm-Bonferroni adjusted  $p = 4.9 \times 10^{-3}$ ). **B)** PC2 represents a composite measure of diet-altered behavior, as individual loadings onto PC2 (“DAB scores”; 19.2% of all variance in behavior) were significantly higher in Mediterranean diet compared to Western diet animals ( $t_{(26,8)} = 4.13, p = 3.2 \times 10^{-4}$ ). **C)** Principal component 2 (PC2) explained 19.2% of the variance in behavior and was the only PC significantly correlated with diet. **D)** Six of the 20 behaviors observed are significantly correlated with DAB score (Holm-Bonferroni adjusted  $p < 0.05$ ). Here, significant correlations with DAB score in which behaviors are more frequent in Mediterranean diet or Western diet monkeys are indicated with blue or orange points, respectively.

284

285 *Diet-altered behaviors and monocyte gene expression as mediators*

286 Given the effects of diet on both behavior and gene expression, we used mediation analyses to

287 explore the potential influences of one on the other. Of the 4,900 DEGs, 29% were also



288 significantly associated with the DAB score in a univariate model ( $n = 1,414$ ,  $FDR < 0.05$ ). Of  
289 these, DAB score significantly mediated the effect of diet on the expression of 1199 genes (24%  
290 of all DEGs,  $p < 0.05$ ; Fig. 5A). Among these DAB-mediated genes, DAB score mediation  
291 accounted for significantly more of the total effect of diet in Western genes (mean = 52.6 %, s.d.  
292 = 12.6%), than Mediterranean genes (mean = 45.3 %, s.d. = 10.1%; Mann-Whitney  $U = 1.1 \times$   
293  $10^5$ ,  $p = 6.4 \times 10^{-25}$ ; Fig. 5B). These DAB-mediated genes were also significantly more likely to  
294 be Western genes than Mediterranean genes ( $n = 712$  Western genes, 59%, two-sided binomial  
295 test  $p = 1.5 \times 10^{-21}$ ), and were enriched in regulation of inflammatory response (GO:0050727,  
296 weighted FET  $p = 2.9 \times 10^{-3}$ ; for all GO terms significantly enriched in DAB-mediated genes,  
297 see Tables S5A-C). Together, these observations suggest that the effect of diet on monocyte gene  
298 regulation may partially be due to diet-induced changes in key social behaviors.

299

300 We also tested the hypothesis that peripheral immune cell gene expression mediated the effects  
301 of diet on behavior in the 27% of DEGs for which monocyte gene expression significant  
302 predicted DAB in a univariate model ( $n = 1,324$ ,  $FDR < 0.05$ ). Gene expression mediated the  
303 effect of diet on DAB score in 898 genes (18% of all DEGs,  $p < 0.05$ ; Fig. 5A). Almost all of  
304 these genes (99%; 889/898) were in the set of genes for which behavioral changes mediated  
305 changes in gene expression. The genes that mediated the effect of diet on DAB score were more  
306 likely to be Western genes ( $n = 523$  Western genes, 58%, two-sided binomial test  $p = 4.6 \times 10^{-$   
307  $14$ ), however the portion of the total effect of diet that was accounted for by gene expression did  
308 not vary between Western (mean = 27.1 %, s.d. = 5.2%) and Mediterranean genes (mean = 27.1  
309 %, s.d. = 4.5%; Mann-Whitney  $U = 1.0 \times 10^5$ ,  $p = 0.55$ ; Fig. 5C).

310

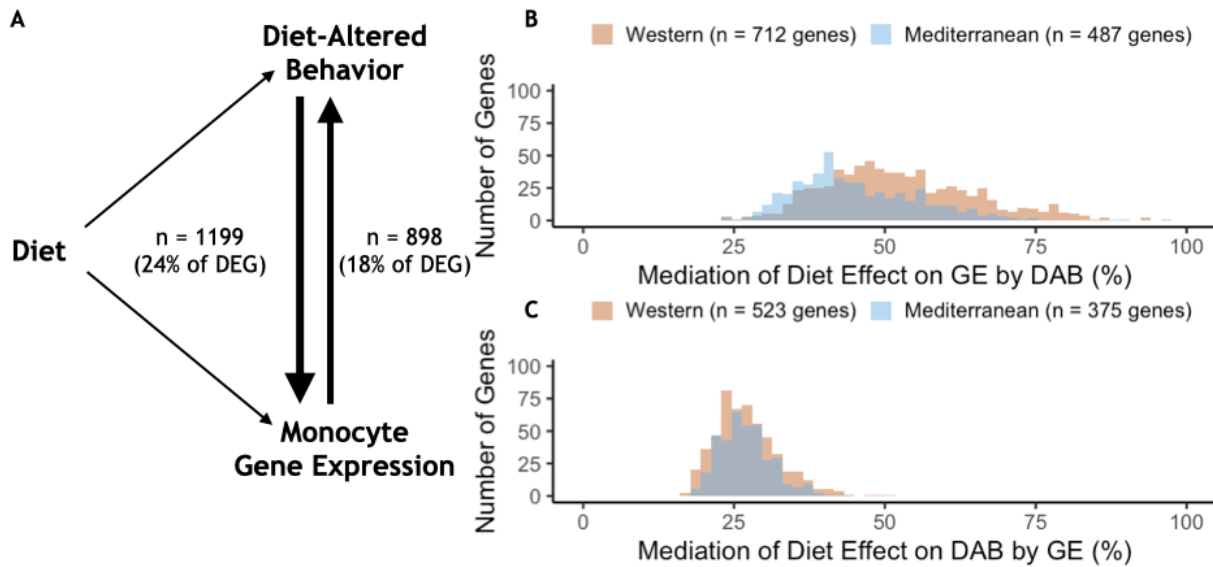

**Figure 5. Behavior partially mediates the effect of diet on gene expression for 25% of diet-associated genes.**

**A)** Diet-altered behavior (DAB) mediated the effect of diet on gene expression for 25% ( $n = 1220$ ) of genes for which diet had an effect (DEG). For 19% of differentially expressed genes (DEG), gene expression mediated the effect of diet on DAB score. **B)** DAB score mediated 24-97% of the total effect of diet on gene expression in 1220 genes ( $n = 741$  Western genes, orange;  $n = 479$  Mediterranean genes, blue). DAB score mediated a greater number of Western genes than Mediterranean genes ( $p = 6.3 \times 10^{-14}$ ) and accounted for a greater portion of the effect size of diet ( $p = 7.5 \times 10^{-23}$ ) in Western genes. **C)** In gene-by-gene models of DAB score as a function of diet + gene expression, gene expression mediated 15-51% of the total effect of diet on DAB in 940 genes ( $n = 558$  Western genes;  $n = 382$  Mediterranean genes). Gene expression mediated a greater number of Western genes than Mediterranean genes ( $p = 1.0 \times 10^{-8}$ ), although expression of these genes did not account for more of the effect of diet on DAB score than Mediterranean genes (Mann-Whitney  $U = 1.1 \times 10^5$ ,  $p = 0.75$ ).

311

312 *Diet differentially induced expression of the conserved transcriptional response to adversity*

313 *(CTRA) genes*

314 Additional analyses focused on expression of a well-studied set of social adversity-responsive

315 genes known as the “conserved transcriptional response to adversity” (CTRA) (Cole et al., 2015)

316 in the Western- and Mediterranean-fed animals in our study. Animals fed a Western diet  
317 exhibited significantly higher expression of pro-inflammatory genes included in the CTRA  
318 (Mann-Whitney  $U = 222$ ,  $p = 0.016$ ) and lower expression of antiviral- and antibody-related  
319 CTRA genes (Mann-Whitney  $U = 82$ ,  $p = 0.023$ ; Fig. S3; for categorization of CTRA genes, see  
320 Table S1).

321

### 322 *Western diet induced a mosaic response*

323 Western diet induced substantial variation in multiple phenotypes, including body weight, gene  
324 expression, and behavior; consistent with previous studies demonstrating that some individuals  
325 may be more resistant (or susceptible) to the effects of a Western diet (Shively et al., 2009),  
326 presumably due to genetic variation or past environmental exposures. However, we were unable  
327 to identify consistencies in individual responsiveness across the phenotypes (Fig. S4A-C). For  
328 instance, monkeys that exhibited a strong gene regulatory response to the Western diet did not  
329 necessarily exhibit a large increase in body weight or a strong negative DAB score (all  $p > 0.2$ ).  
330 Furthermore, change in body weight did not significantly predict gene expression in monocytes  
331 (FDR  $< 0.2$ ). Western diet fed individuals thus exhibited a mosaic response to diet across  
332 multiple phenotypes, presumably involving interactions between diet, stress, behavior,  
333 environment, microbiome, and genome/epigenome.

334

### 335 **Discussion**

336 This study shows, for the first time, that a whole-diet manipulation exerted profound effects on  
337 monocyte polarization and social behavior in primates. Forty percent of expressed genes were  
338 differentially expressed between monkeys fed Western or Mediterranean diets, indicating that

339 diet dramatically altered monocyte programming. Relative to monocytes from Mediterranean-fed  
340 subjects, monocytes from Western diet consumers exhibited increased expression of  
341 proinflammatory and monocyte polarization regulatory genes. Our findings extend previous  
342 studies, such as a randomized human cross-over trial that demonstrated changes in monocyte  
343 proinflammatory genes in elderly individuals consuming a Mediterranean like diet enriched in  
344 olive oil versus a diet more enriched in saturated fat (butter) (Camargo et al., 2012).

345

346 We identified a putative molecular mechanism, altered monocyte polarization, that may  
347 contribute to the established links between changes in human diets associated with  
348 industrialization and increases in chronic disease (Cordain et al., 2005; Drake et al., 2018; Jacka  
349 et al., 2010; Lea et al., 2020; Manzel et al., 2014; Pontzer et al., 2018; Smil, 1989; Smyth &  
350 Heron, 2006). Comparative studies of human health across different modern populations –  
351 namely those consuming traditional hunter-gatherer, forager-horticulturalist, or pastoralist diets  
352 versus modern, Western-like diets – lend support for the evolutionary mismatch hypothesis  
353 (Eaton et al., 1988; H. Kaplan et al., 2017; Lea et al., 2020; Pontzer et al., 2018). In particular,  
354 this work has found that traditional populations have much lower rates of non-communicable  
355 diseases, especially cardiometabolic diseases, relative to Western societies; however, because so  
356 many lifestyle factors differ between traditional and Western, HICs, it has been difficult to  
357 understand the role of diet specifically in driving health variation or to address causality  
358 (Snodgrass, 2013; Kraft et al., 2018; Lagranja et al., 2015). Our preclinical randomized study  
359 design allows us to draw causal inferences about the role of Western diets in the development of  
360 chronic diseases of aging, and provides important data about cellular and molecular mechanisms  
361 that may contribute to evolutionary mismatch. These data support future studies to compare the

362 transcriptional response to diet in our preclinical study with the gene regulatory variation  
363 observed between traditional and more market-integrated or Western-like human groups.  
364  
365 Beyond alterations in gene expression, we also identified differences in gene co-expression and  
366 enrichment of transcription factor binding motifs, suggesting that diet exerts differential effects  
367 on gene regulatory networks. Numerous transcription factors appear to be involved in diet-  
368 regulated gene expression. Members of the E26 transformation-specific (ETS), specificity  
369 protein (Sp)/Krüppel-like family (KLF), myocyte-specific enhancer factor (MEF), and  
370 interferon-regulatory factor (IRF) families of transcription factors, which have all been linked to  
371 myeloid differentiation (Chistiakov et al., 2018; Schuler et al., 2008; Scott et al., 1994; Zhang et  
372 al., 1994), were overrepresented in regulatory regions of genes with higher expression in the  
373 Mediterranean diet group (“Mediterranean genes). Three IRF family transcription factors had  
374 binding motifs enriched in Mediterranean genes: IRF-1 and IRF-8 are both linked to M1  
375 monocyte polarization, while IRF-3 is associated with M2 polarization. The sole transcription  
376 factor with binding sites enriched in Western diet-associated genes, ATF2, is a key mediator of  
377 inflammatory pathways and diseases, including response to bacterial endotoxin, atherosclerosis,  
378 and obesity (Fledderus et al., 2007; Miyata et al., 2012; Reimold et al., 2001). Western genes  
379 were enriched for activation of the MAPKK pathway, which lies upstream of ATF2 (Herlaar &  
380 Brown, 1999), supporting a role in monocyte polarization. Transcription factors were also  
381 overrepresented in the pairs of differentially co-expressed genes, further indicating that diet  
382 alters regulatory networks and monocyte differentiation and polarization.  
383  
384 It is also worth pointing out that changes in gene co-expression and network connectivity have

385 been previously proposed as a response to novel or challenging environmental conditions,  
386 including Western diets. In particular, work on decanalization has hypothesized that gene  
387 regulatory networks evolve over many generations of stabilizing selection, and that novel  
388 environmental challenges (such as Western diets and lifestyles) may disrupt these fine-tuned  
389 connections leading to dysregulation, a breakdown in co-expression, and ultimately disease  
390 (Careau et al., 2014; Gibson, 2009a, 2009b; Hu et al., 2016; Lea et al., 2019). In support of this  
391 idea, we found diet-induced changes in the co-expression of transcription factors involved in  
392 insulin secretion and glucose tolerance (*SOX4*), lipid, carbohydrate, and energy metabolism  
393 (*NR4A2*), and BMI, HDL, and aging (*RF00283*) (Davis et al., 2017; Dluzen et al., 2018;  
394 Goldsworthy et al., 2008; Kanai et al., 2018; Pearen & Muscat, 2010). We also observed that the  
395 transcription factor *MEF2D*, which has previously been implicate in the transcriptomic response  
396 to insulin signaling (Samson & Wong, 2002; Solomon et al., 2008), is a hub gene identified in 22  
397 differentially-correlated gene pairs. Hub genes like *MEF2D* may pinpoint optimized systems that  
398 break down as a result of mismatch and are thus intriguing targets for future analyses.

399

400 It is worth noting that the dichotomous M1/M2 paradigm of monocyte polarization is an  
401 oversimplification of the more complex heterogeneity of monocytes. (Martinez & Gordon, 2014;  
402 Nahrendorf & Swirski, 2016) For example, there are at least three classes of monocytes in the  
403 circulation—classical, intermediate, and non-classical. We did not assess the relative abundance  
404 of these subsets, thus the observed gene expression patterns could reflect either changes in the  
405 relative proportions of these subsets and/or shifts in monocyte polarization within subsets  
406 (Michalson et al., 2019; Wolf et al., 2017).

407

408 The diets also altered key behaviors. Monkeys consuming the Western diet exhibited more  
409 behaviors related to anxiety and social isolation, a phenotype remarkably similar to that observed  
410 in juvenile Japanese macaques born to mothers consuming a high-fat Western diet (Thompson et  
411 al., 2018). In that study, offspring behavior was associated with maternal levels of macrophage-  
412 derived chemokine (MDC), which showed higher expression in Western-diet fed animals in our  
413 study ( $\beta_{diet} = 0.243$ , FDR = 0.059). Our findings suggest that a Western diet may also exert  
414 similar behavioral effects when consumed during adulthood.

415  
416 There are myriad pathways through which diet may affect behavior. Diet may induce changes in  
417 the central nervous system by altering gut microbiota which alters vagal input to the brain  
418 (Bonaz et al., 2018). Previous results from our study demonstrated a strong diet effect on the gut  
419 microbiome (Nagpal et al., 2018), and lower parasympathetic (vagal) activity in the Western diet  
420 group at the time the monocyte transcriptome was assessed (Shively et al., 2020). Taken together  
421 these observations suggest that diet-induced changes in vagal tone in the gut-brain axis may be  
422 one pathway through which diet impacted brain function, potentially affecting behavior.

423  
424 Diet-altered behaviors were linked to changes in monocyte gene expression. For a subset (24%)  
425 of genes, the DAB score mediated the effect of diet on monocyte gene expression. Monocytes  
426 have been shown to be responsive to social isolation (Cole, 2019) and anxiety (Cole et al., 2015).  
427 Social isolation and anxiety, produced by Western diet consumption, may be accompanied by  
428 increased sympathetic outflow and increased hypothalamic-pituitary adrenal production of  
429 cortisol, both of which modulate monocyte intracellular processes governing inflammatory  
430 molecule production (Cacioppo et al., 2015; Holwerda et al., 2018; Juruena et al., 2020).

431 Supporting the involvement of these systems, we previously reported that the Western diet group  
432 had increased sympathetic activity, and increased cortisol concentrations (Shively et al.,  
433 2020). Western diet may contribute to inflammation by producing a more socially isolated or  
434 anxious animal with increased sympathetic and hypothalamic pituitary adrenal activity, which in  
435 turn alters monocyte function. Higher expression of genes in the conserved transcriptional  
436 response to adversity support this pathway (Cole, 2019; Cole et al., 2015) (Fig. S3). Behavior is  
437 a functional assay for the central nervous system. Thus, this observation suggests that diet may  
438 alter central nervous system function, which may in turn alter circulating monocyte gene  
439 expression.

440

441 In a somewhat smaller and overlapping subset of genes (18%), diet-induced differences in  
442 monocyte gene expression significantly mediated the effect of diet on behavior (DAB). This  
443 observation suggests that diet alters monocyte gene expression, which in turn may affect central  
444 nervous system function. There are a variety of mechanisms through which diets differentially  
445 influence the nervous system. Western diet may disrupt the blood-brain barrier, increasing  
446 infiltration of Western-diet induced cytokines, chemokines, and myeloid cells from the periphery  
447 (Raison et al., 2006; Yang et al., 2019). Once in the brain these molecules can alter BDNF  
448 production, neurotransmitter systems, and hypothalamic-pituitary-adrenal function (Raison et al.,  
449 2006). Western diet induced inflammatory molecules also may affect the brain through direct  
450 effects on the afferent vagus nerve (Maier & Watkins, 1998), activation of glial cells (Graham et  
451 al., 2016), and alter neuronal membrane lipid composition affecting neurotransmission (Du et al.,  
452 2016), whereas a Mediterranean diet may have direct anti-inflammatory actions by increasing n-  
453 3 fatty acids in the brain (Layé et al., 2018).



454

455 Together, these results support both mediation pathways, suggesting that multiple mechanistic  
456 pathways may contribute to these observations; however, we are unable to conclusively state that  
457 one mediation pathway is supported over the other. As each gene is modeled independently in  
458 the mediation analyses, it is possible that the expression of a subset of genes in monocytes alters  
459 central nervous system function and induces behavioral change, while expression of another  
460 subset of genes is responsive to behavioral phenotypes and the central nervous system function  
461 driving them. These two possibilities present an intriguing possibility for future experiments.

462

463 In summary, we found that diet significantly alters monocyte polarization and gene expression,  
464 and to a lesser extent behavior. The Western diet promoted a proinflammatory monocyte  
465 phenotype relative to a Mediterranean diet, which supports the role of monocyte polarization in  
466 diet-associated chronic inflammatory diseases. Thus, altered monocyte programming represents  
467 a putative proximate mechanism underlying the evolutionary mismatch between our past and  
468 current diets. This suggests that avoiding a Western-style diet and/or consuming a  
469 Mediterranean-style diet could be beneficial in preventing or treating chronic inflammation and  
470 disease. The majority of the effects of diet are presumably mediated through direct or combined  
471 actions of saturated/polyunsaturated fats, n-6:n-3 ratios, pro- and anti-antioxidant characteristics,  
472 and other features of the Western diet inconsistent with the nutritional environment in which  
473 humans and nonhuman primates evolved. Ongoing and future work will address interactions  
474 between social behavior (e.g., social status) and diet to further understand how environmental  
475 stressors may impact inflammation in the periphery and in the central nervous system.

476

## 477 **Materials and Methods**

### 478 *Subjects*

479 Forty-three adult (age: mean = 9.0, range = 8.2-10.4 years, estimated by dentition), female  
480 cynomolgus macaques (*Macaca fascicularis*), were obtained (Shin Nippon Biomedical  
481 Laboratories, USA SRC, Alice, TX) and housed at the Wake Forest School of Medicine Primate  
482 Center (Winston-Salem, NC) (Shively et al., 2019). Briefly, the monkeys were socially housed in  
483 groups of 3-4 and consumed standard monkey chow (Table 1) during an eight-month baseline  
484 phase, after which pens were assigned to receive either the Western (5 groups,  $n = 21$ ) or  
485 Mediterranean (6 groups,  $n = 22$ ) diet, balanced on pretreatment characteristics that reflected  
486 overall health, including body weight, body mass index, and plasma triglyceride concentrations  
487 (Shively et al., 2019). Two monkeys did not tolerate the experimental diet, and were switched to  
488 standard monkey chow, three animals died during the course of the study, and three samples  
489 were removed for insufficient CD14 purification (see “Removal of Batch Effects” below),  
490 resulting in a final sample size of 35 animals (Western  $n = 20$ , Mediterranean  $n = 15$ ). All animal  
491 manipulations were performed according to the guidelines of state and federal laws, the US  
492 Department of Health and Human Services, and the Animal Care and Use Committee of Wake  
493 Forest School of Medicine.

494

### 495 *Experimental Diets*

496 Experimental diets (Table 1) were formulated to be isocaloric with respect to protein, fat, and  
497 carbohydrates, and identical in cholesterol content ( $\sim 320\text{mg} / 2000$  kilocalories (Cals)/day) as  
498 previously described (Shively et al., 2019).

**Table 1. Nutritional Contents of Human and Nonhuman Primate Diets**

| Diet Composition          | Human              |                      | Nonhuman Primate    |                    |                   |
|---------------------------|--------------------|----------------------|---------------------|--------------------|-------------------|
|                           | Western            | Mediterranean        | Western             | Mediterranean      | Chow <sup>#</sup> |
| % of Calories             |                    |                      |                     |                    |                   |
| Protein                   | 15 <sup>a</sup>    | 17 <sup>b</sup>      | 16 <sup>a</sup>     | 16 <sup>b</sup>    | 18                |
| Carbohydrate <sup>†</sup> | 51 <sup>a</sup>    | 51 <sup>b</sup>      | 54 <sup>a</sup>     | 54 <sup>b</sup>    | 69                |
| Fat                       | 33 <sup>a</sup>    | 32 <sup>b</sup>      | 31 <sup>a</sup>     | 31 <sup>b</sup>    | 13                |
| % of Total Fats           |                    |                      |                     |                    |                   |
| Saturated                 | 33 <sup>a</sup>    | 21 <sup>b</sup>      | 36 <sup>a</sup>     | 21 <sup>b</sup>    | 26                |
| Monounsaturated           | 36 <sup>a</sup>    | 56 <sup>b</sup>      | 36 <sup>a</sup>     | 57 <sup>b</sup>    | 28                |
| Polyunsaturated           | 24 <sup>a</sup>    | 15 <sup>b</sup>      | 26 <sup>a</sup>     | 20 <sup>b</sup>    | 32                |
| Other Nutrients           |                    |                      |                     |                    |                   |
| ω6:ω3 Fatty Acids         | 15:1 <sup>c</sup>  | 2.1-3:1 <sup>d</sup> | 14.8:1 <sup>c</sup> | 2.9:1 <sup>d</sup> | 12:01             |
| Cholesterol mg/Cal        | 0.13 <sup>a</sup>  | 0.16 <sup>b</sup>    | 0.16 <sup>a</sup>   | 0.15 <sup>b</sup>  | trace             |
| Fiber g/Cal               | 0.01 <sup>a</sup>  | 0.03 <sup>e</sup>    | 0.02 <sup>a</sup>   | 0.04 <sup>e</sup>  | 0.01              |
| Sodium mg/Cal             | 1.7 <sup>a,f</sup> | 1.3 <sup>b,e</sup>   | 1.7 <sup>a,f</sup>  | 1.0 <sup>b,e</sup> | 0.25              |

<sup>#</sup> LabDiet Chemical Composition Diet 5037/8. Type of fat known in 86% of total fat. Omega-6 from corn and pork fat.

<sup>†</sup> Human carbohydrate calories include alcohol.

<sup>a</sup> (CDC, 2014)

<sup>b</sup> (Bédard et al., 2012)

<sup>c</sup> (Simopoulos, 2006)

<sup>d</sup> (Cordain et al., 2005)

<sup>e</sup> (Kafatos et al., 2000)

<sup>f</sup> (Powles et al., 2013)

*reprinted from Shively et al. 2019 Obesity with permission (Shively et al., 2019)*

499

500 *Behavioral Characterization*

501 Behavioral data were collected weekly during two 10-minute focal observations, balanced for  
 502 time of day, for 6 weeks during the baseline phase (2 hours/monkey total) and for 14 months  
 503 during the experimental phase (17.7 hours/monkey total). Behaviors recorded included the  
 504 frequency of aggressive and submissive behaviors, time spent in positive social interactions such  
 505 as sitting in body contact and grooming or alone, and anxious behavior defined as self-directed

506 behaviors including self-grooming and scratching (Maestriperi et al., 1992; Schino et al., 1996;  
507 Shively et al., 2015; Troisi et al., 2000; Troisi, 2002). Behaviors were collected as previously  
508 described (Shively, 1998), and combined into summary behaviors (e.g., “aggression” was a  
509 combination of all total, noncontact, contact aggressive events). No significant differences in  
510 behavior were observed between the diet groups which consuming the baseline standard monkey  
511 chow diet (Fig. S1A, B). In order to quantify the overall impact of diet on behavior, we  
512 conducted a principal component analysis using the R package *FactoMineR* (Lê et al., 2008). We  
513 corrected for multiple hypothesis tests using the Holm-Bonferroni adjusted p-values.

514

#### 515 *Blood Sample Collection*

516 The monkeys were trained to run out of their social groups on voice command. Blood was drawn  
517 via venipuncture within 9 minutes of entering the building. Blood was collected into EDTA-  
518 containing tubes, mixed with an equal amount of PBS without calcium or magnesium, and  
519 overlaid on a 90% Ficoll-Paque Plus/10% PBS solution in LeucoSep tubes followed by  
520 centrifugation at 800 x g for 20 min. Isolated PBMCs were then immediately used for the  
521 collection of CD14<sup>+</sup> monocytes by positive selection using a Miltenyi bead-based protocol  
522 following manufacturer’s instructions (Miltenyi Biotec, Bergisch Gladbach, Germany). After  
523 assessing cell viability and numbers, CD14<sup>+</sup> monocytes were stored in 85% FBS, 15% DMSO  
524 sterile freezing media at -80°C and transferred to liquid nitrogen for storage until RNA  
525 extraction.

526

#### 527 *RNA extraction and sequencing*

528 RNA was extracted from monocytes using the AllPrep DNA/RNA Mini Kit (Qiagen, Inc.,

529 Hilden, Germany), and quantified using a NanoDrop spectrophotometer and Agilent 2100  
530 Bioanalyzer with RNA 6000 Nano chips (Agilent Technology, Inc., Santa Clara, CA). RNA  
531 libraries were prepared for sequencing by the Cancer Genomics Shared Resource (Wake Forest  
532 School of Medicine, Winston-Salem, NC) using the TruSeq-stranded total RNA kit (Illumina),  
533 which includes a ribosomal depletion step. The RNA-seq libraries were then sequenced using  
534 single-end 76-bp reads on an Illumina NextSeq 500 to an average read depth of 34.5 million  
535 reads per sample (range 25.9 – 41.6 million reads). Reads were mapped to the *Macaca*  
536 *fascicularis* reference genome (Macaca\_fascicularis\_5.0, v 93, Ensembl) (Kersey et al., 2018;  
537 Kinsella et al., 2011) using HiSat2 (Kim et al., 2015) and then converted to a sample-by-gene  
538 read count matrix using featureCounts (Liao et al., 2014) (median = 38.0%; range 24.5 - 50.4%  
539 of reads mapped to exons).

540

#### 541 *Read Count Normalization and Removal of Batch Effects*

542 First, we removed genes with low expression (median reads per kilobase per million reads  
543 mapped < 1), which resulted in 12,240 genes for downstream analyses. We normalized read  
544 counts using the *voom* function of the R package *limma* (Ritchie et al., 2015). While  
545 investigating monocyte purity, three samples differed in CD3 gene expression from the rest by  
546 several orders of magnitude. We concluded that these samples were contaminated with CD3+  
547 cells (i.e., inefficient CD14 purification, see Fig. S5) and excluded them from all analyses,  
548 leaving a final sample size of 35 monkeys ( $n = 20$  fed the Western diet,  $n = 15$  Mediterranean  
549 diet). To control for batch effects related to RNA quality and monocyte purity, we calculated the  
550 residual gene expression from a model of normalized gene expression as a function of CD14  
551 expression, CD3 expression, RNA integrity, and RNA concentration. These residual gene

552 expression values were used for all subsequent analyses.

553

#### 554 *Modeling Effect of Diet on Gene Expression*

555 In order to determine which genes were significantly affected by diet, we modeled the residual

556 expression of each gene as a function of diet using a linear mixed effects model controlling for

557 relatedness among monkeys using the R package *EMMREML* (Akdemir & Godfrey, 2015).

558 Relatedness was estimated using the ngsRelate program (Hanghøj et al., 2019) with SNP

559 genotypes inferred from the RNA-seq reads using bcftools mpileup (Li et al., 2009). We

560 calculated an empirical false discovery rate (FDR) for each gene using a permutation-based

561 approach (Snyder-Mackler et al., 2016, p.), and report genes that passed at  $FDR < 0.05$ . To

562 examine global patterns of variation in gene expression, we conducted principal component

563 analysis on the correlation matrix of normalized residual gene expression using the *prcomp*

564 function in R.

565

#### 566 *Enrichment analyses*

567 Gene ontology (GO) enrichment analyses were conducted using Fisher's Exact Tests and the

568 *weight01* algorithm to test for enrichment implemented in the R package *topGO* (Alexa &

569 Rahnenfuhrer, 2019). For a more targeted analysis of M1 and M2 specific genes, we identified a

570 set of DEGs in our data set that were previously found to be involved in monocyte polarization

571 (Schmidl et al., 2014) (638 proinflammatory and 138 regulatory), which we used to explore

572 monocyte polarization in the current study. We calculated the proportion of genes more highly

573 expressed in the Mediterranean- and Western-fed animals in each polarization category and

574 tested for significance using a permutation test ( $n = 100,000$  permutations).

575

576 *Transcription Factor Binding Site Analysis*

577 We tested for enrichment of transcription factor binding motifs within 2 kb (upstream or  
578 downstream) of the transcription start sites of differentially expressed “Western genes” or  
579 “Mediterranean genes” (FDR < 0.05) using the program HOMER (Heinz et al., 2010) and  
580 equivalent regions around the transcription start sites of all genes expressed in these data as the  
581 background set for enrichment testing. We searched for known vertebrate transcription factor  
582 binding motifs and report the TF motifs passing a threshold of FDR < 0.05.

583

584 *Gene-gene co-expression analysis*

585 In addition to testing whether diet led to mean differences in gene expression between Western  
586 and Mediterranean animals, we also tested whether diet impacted the correlation structure among  
587 expressed genes (i.e., gene co-expression). Specifically, we employed ‘correlation by individual  
588 level product’ (CILP) (Lea et al., 2019) analyses to test whether diet affected the magnitude or  
589 direction of pairwise gene expression correlations among the top 140 DEGs ( $n = 9730$  gene-gene  
590 pairs tested). To test whether a given pair of genes was differentially co-expressed as a function  
591 of diet, we first obtained a vector of products for each gene pair by multiplying the normalized  
592 gene expression values for two genes together. Normalization was performed by scaling  
593 expression values to mean 0 and unit variance within Mediterranean and Western subsets of the  
594 data respectively, to ensure that distributional differences between sample groups did not bias  
595 our results, following the CILP authors’ recommendations (Lea et al., 2019). Each of these  
596 vectors of products were used as the outcome variable in a linear mixed effects model  
597 implemented in the R package *EMMREML* (Akdemir & Godfrey, 2015), which included a fixed

598 effect of diet and a random effect to control for genetic relatedness. To assess significance, we  
599 extracted the p-value associated with the diet effect for all 9730 gene pairs. We then repeated  
600 each linear mixed effects model 100 times after permuting diet, extracted the p-value associated  
601 with the diet effect, and used these values to calculate an empirical FDR distribution (Snyder-  
602 Mackler et al., 2016).

603

604 Using this approach, we identified 445 gene pairs that were significantly differentially co-  
605 expressed as a function of diet at a 20% empirical FDR. Next, we performed two follow up  
606 analyses to understand their biological import. First, we tested for the existence of ‘hub genes’,  
607 defined as genes that displayed differential co-expression to their tested partner genes more so  
608 than expected by chance. To define the null distribution for identifying hub genes, we randomly  
609 sampled 445 gene pairs from the set of all 9730 tested gene pairs 1000 times and calculated the  
610 number of partners a focal gene had in each sample; we considered a gene to be a significant  
611 ‘hub gene’ if it fell outside the 95<sup>th</sup> percentile of this distribution, which was equivalent to a focal  
612 gene that displayed significant differential co-expression with 13 or more of its tested partner  
613 genes. Second, we asked whether the set of ‘hub genes’ we identified were enriched for  
614 transcription factors, relative to the background set of all 140 genes tested for differential co-  
615 expression. We performed this analysis because many of the proposed mechanisms to generate  
616 large scale changes in gene co-expression patterns involve changes in transcription factor  
617 function or activity (de la Fuente, 2010; Gaiteri et al., 2014). To implement the enrichment  
618 analysis, we used the TRRUST database of known mammalian transcription factors for  
619 annotation (Han et al., 2018) paired with hypergeometric tests.

620



621 *Mediation analysis*

622 To explore relationships between DAB score and differential gene expression, we conducted  
623 mediation analyses using a bootstrapping approach involving 10,000 bootstrap iterations of two  
624 models: (Model 1) the expression of each gene as a function of diet, and (Model 2) the  
625 expression of each gene as a function of diet and DAB score (Preacher & Hayes, 2004). For each  
626 bootstrap iteration, we then calculated the mediation effect (i.e., the indirect effect) of DAB score  
627 as the difference between the effect size of diet in Model 1 ( $\beta_{diet}$ ) and Model 2 ( $\beta'_{diet}$ ). We  
628 considered there to be a mediation effect when the 90% confidence interval for the indirect effect  
629 ( $\beta_{diet} - \beta'_{diet}$ ) did not include zero.

630

631 A similar method was used to calculate the mediation of gene expression on DAB, testing the  
632 difference between the effect size of diet in two models: (Model 3) DAB as a function of diet,  
633 and (Model 4) DAB as a function of diet and the expression of each gene.

634

635 **Supplementary Materials**

636 Fig. S1. Diet manipulation altered behavior.

637 Fig. S2. The first PC of all behavioral data captures dominance rank.

638 Fig. S3. Expression of genes in the conserved transcriptional response to adversity (CTRA (Cole  
639 et al., 2015)) indicate inflammatory effects of a Western diet that parallel the effects of social  
640 adversity.

641 Fig. S4. Greater phenotypic variability in Western diet fed monkeys does not show consistency  
642 in individual responsiveness across phenotypes.

643 Fig. S5. Quality control of cell purity by CD14 and CD3 expression levels: three samples were

644 excluded due to lower CD14 and high CD3 – possible T cell contamination.

645 Fig. S6. RNA Integrity was correlated with both uncorrected gene expression and relative rank.

646 Table S1. Effects of Diet on Gene Expression

647 Table S2A. Biological Processes Enriched in Western Genes Compared to Other Measured

648 Genes

649 Table S2B. Biological Processes Enriched in Mediterranean Genes Compared to Other Measured

650 Genes

651 Table S3. Transcription Factor Binding Site Motif Enrichment

652 Table S4A. Gene Pair Correlations Across and Within Diet Groups

653 Table S4B. Differentially Correlated Genes

654 Table S5A. Biological Processes Enriched in Behavior-Mediated Differentially-Expressed Genes

655 (DEG)

656 Table S5B. Biological Processes Enriched in Behavior-Mediated Western Genes

657 Table S5C. Biological Processes Enriched in Behavior-Mediated Mediterranean Genes

658 Note S1. Regarding rank and RNA integrity (RIN).

659

## 660 **References**

661 Akdemir, D., & Godfrey, O. U. (2015). *EMMREML: Fitting Mixed Models with Known*

662 *Covariance Structures* (R package version 3.1) [Computer software]. [https://CRAN.R-](https://CRAN.R-project.org/package=EMMREML)

663 [project.org/package=EMMREML](https://CRAN.R-project.org/package=EMMREML)

664 Alexa, A., & Rahnenfuhrer, J. (2019). *TopGO: Enrichment Analysis for Gene Ontology*. (R

665 package version 2.36.0) [Computer software].

- 666 Bédard, A., Riverin, M., Dodin, S., Corneau, L., & Lemieux, S. (2012). Sex differences in the  
667 impact of the Mediterranean diet on cardiovascular risk profile. *The British Journal of*  
668 *Nutrition*, 108(8), 1428–1434. <https://doi.org/10.1017/S0007114511006969>
- 669 Benito, X., Fritz, S. C., Steinitz-Kannan, M., Vélez, M. I., & McGlue, M. M. (2018). Lake  
670 regionalization and diatom metacommunity structuring in tropical South America.  
671 *Ecology and Evolution*, 8(16), 7865–7878. <https://doi.org/10.1002/ece3.4305>
- 672 Bonaz, B., Bazin, T., & Pellissier, S. (2018). The Vagus Nerve at the Interface of the Microbiota-  
673 Gut-Brain Axis. *Frontiers in Neuroscience*, 12. <https://doi.org/10.3389/fnins.2018.00049>
- 674 Cacioppo, J. T., Cacioppo, S., Capitanio, J. P., & Cole, S. W. (2015). The neuroendocrinology of  
675 social isolation. *Annual Review of Psychology*, 66, 733–767.  
676 <https://doi.org/10.1146/annurev-psych-010814-015240>
- 677 Camargo, A., Delgado-Lista, J., Garcia-Rios, A., Cruz-Teno, C., Yubero-Serrano, E. M., Perez-  
678 Martinez, P., Gutierrez-Mariscal, F. M., Lora-Aguilar, P., Rodriguez-Cantalejo, F.,  
679 Fuentes-Jimenez, F., Tinahones, F. J., Malagon, M. M., Perez-Jimenez, F., & Lopez-  
680 Miranda, J. (2012). Expression of proinflammatory, proatherogenic genes is reduced by  
681 the Mediterranean diet in elderly people. *The British Journal of Nutrition*, 108(3), 500–  
682 508. <https://doi.org/10.1017/S0007114511005812>
- 683 Careau, V., Buttemer, W. A., & Buchanan, K. L. (2014). Early-Developmental Stress,  
684 Repeatability, and Canalization in a Suite of Physiological and Behavioral Traits in  
685 Female Zebra Finches. *Integrative and Comparative Biology*, 54(4), 539–554.  
686 <https://doi.org/10.1093/icb/icu095>
- 687 Chistiakov, D. A., Myasoedova, V. A., Revin, V. V., Orekhov, A. N., & Bobryshev, Y. V.  
688 (2018). The impact of interferon-regulatory factors to macrophage differentiation and

- 689 polarization into M1 and M2. *Immunobiology*, 223(1), 101–111.
- 690 <https://doi.org/10.1016/j.imbio.2017.10.005>
- 691 Cole, S. W. (2013). Social regulation of human gene expression: Mechanisms and implications  
692 for public health. *American Journal of Public Health*, 103 Suppl 1, S84-92.
- 693 <https://doi.org/10.2105/AJPH.2012.301183>
- 694 Cole, S. W. (2019). The Conserved Transcriptional Response to Adversity. *Current Opinion in*  
695 *Behavioral Sciences*, 28, 31–37. <https://doi.org/10.1016/j.cobeha.2019.01.008>
- 696 Cole, S. W., Levine, M. E., Arevalo, J. M. G., Ma, J., Weir, D. R., & Crimmins, E. M. (2015).  
697 Loneliness, eudaimonia, and the human conserved transcriptional response to adversity.  
698 *Psychoneuroendocrinology*, 62, 11–17. <https://doi.org/10.1016/j.psyneuen.2015.07.001>
- 699 Coleman, K., Robertson, N. D., & Bethea, C. L. (2011). Long-term ovariectomy alters social and  
700 anxious behaviors in semi-free ranging Japanese macaques. *Behavioural Brain Research*,  
701 225(1), 317–327. <https://doi.org/10.1016/j.bbr.2011.07.046>
- 702 Cordain, L., Eaton, S. B., Sebastian, A., Mann, N., Lindeberg, S., Watkins, B. A., O’Keefe, J. H.,  
703 & Brand-Miller, J. (2005). Origins and evolution of the Western diet: Health implications  
704 for the 21st century. *The American Journal of Clinical Nutrition*, 81(2), 341–354.  
705 <https://doi.org/10.1093/ajcn.81.2.341>
- 706 Davis, J. P., Huyghe, J. R., Locke, A. E., Jackson, A. U., Sim, X., Stringham, H. M., Teslovich,  
707 T. M., Welch, R. P., Fuchsberger, C., Narisu, N., Chines, P. S., Kangas, A. J., Soininen,  
708 P., Ala-Korpela, M., Kuusisto, J., Collins, F. S., Laakso, M., Boehnke, M., & Mohlke, K.  
709 L. (2017). Common, low-frequency, and rare genetic variants associated with lipoprotein  
710 subclasses and triglyceride measures in Finnish men from the METSIM study. *PLOS*  
711 *Genetics*, 13(10), e1007079. <https://doi.org/10.1371/journal.pgen.1007079>

- 712 de la Fuente, A. (2010). From “differential expression” to ‘differential networking’—  
713 Identification of dysfunctional regulatory networks in diseases. *Trends in Genetics: TIG*,  
714 26(7), 326–333. <https://doi.org/10.1016/j.tig.2010.05.001>
- 715 Devêvre, E. F., Renovato-Martins, M., Clément, K., Sautès-Fridman, C., Cremer, I., & Poitou, C.  
716 (2015). Profiling of the Three Circulating Monocyte Subpopulations in Human Obesity.  
717 *The Journal of Immunology*, 194(8), 3917–3923.  
718 <https://doi.org/10.4049/jimmunol.1402655>
- 719 Dluzen, D. F., Noren Hooten, N., De, S., Wood, W. H., Zhang, Y., Becker, K. G., Zonderman,  
720 A. B., Tanaka, T., Ferrucci, L., & Evans, M. K. (2018). Extracellular RNA profiles with  
721 human age. *Aging Cell*, 17(4), e12785. <https://doi.org/10.1111/accel.12785>
- 722 Drake, I., Sonestedt, E., Ericson, U., Wallström, P., & Orho-Melander, M. (2018). A Western  
723 dietary pattern is prospectively associated with cardio-metabolic traits and incidence of  
724 the metabolic syndrome. *The British Journal of Nutrition*, 119(10), 1168–1176.  
725 <https://doi.org/10.1017/S000711451800079X>
- 726 Drescher, H. K., Weiskirchen, R., Fülöp, A., Hopf, C., de San Román, E. G., Huesgen, P. F., de  
727 Bruin, A., Bongiovanni, L., Christ, A., Tolba, R., Trautwein, C., & Kroy, D. C. (2019).  
728 The Influence of Different Fat Sources on Steatohepatitis and Fibrosis Development in  
729 the Western Diet Mouse Model of Non-alcoholic Steatohepatitis (NASH). *Frontiers in*  
730 *Physiology*, 10. <https://doi.org/10.3389/fphys.2019.00770>
- 731 Du, J., Zhu, M., Bao, H., Li, B., Dong, Y., Xiao, C., Zhang, G. Y., Henter, I., Rudorfer, M., &  
732 Vitiello, B. (2016). The Role of Nutrients in Protecting Mitochondrial Function and  
733 Neurotransmitter Signaling: Implications for the Treatment of Depression, PTSD, and

- 734 Suicidal Behaviors. *Critical Reviews in Food Science and Nutrition*, 56(15), 2560–2578.  
735 <https://doi.org/10.1080/10408398.2013.876960>
- 736 Eaton, S. B., Konner, M., & Shostak, M. (1988). Stone agers in the fast lane: Chronic  
737 degenerative diseases in evolutionary perspective. *The American Journal of Medicine*,  
738 84(4), 739–749. [https://doi.org/10.1016/0002-9343\(88\)90113-1](https://doi.org/10.1016/0002-9343(88)90113-1)
- 739 *Energy Intakes: Percentages of Energy from Protein, Carbohydrate, Fat, and Alcohol, by*  
740 *Gender and Age, What We Eat in America, NHANES 2011-2012* (National Health and  
741 Nutrition Examination Survey Data). (2014). U.S. Department of Health and Human  
742 Services, Centers for Disease Control and Prevention (CDC), National Center for Health  
743 Statistics (NCHS).  
744 <https://www.ars.usda.gov/research/project/?accnNo=426312&fy=2014>
- 745 Estruch, R., Ros, E., Salas-Salvadó, J., Covas, M.-I., Corella, D., Arós, F., Gómez-Gracia, E.,  
746 Ruiz-Gutiérrez, V., Fiol, M., Lapetra, J., Lamuela-Raventos, R. M., Serra-Majem, L.,  
747 Pintó, X., Basora, J., Muñoz, M. A., Sorlí, J. V., Martínez, J. A., Fitó, M., Gea, A., ...  
748 Martínez-González, M. A. (2018). Primary Prevention of Cardiovascular Disease with a  
749 Mediterranean Diet Supplemented with Extra-Virgin Olive Oil or Nuts. *New England*  
750 *Journal of Medicine*, 378(25), e34. <https://doi.org/10.1056/NEJMoa1800389>
- 751 Farchi, G., Fidanza, F., Mariotti, S., & Menotti, A. (1994). Is diet an independent risk factor for  
752 mortality? 20 year mortality in the Italian rural cohorts of the Seven Countries Study.  
753 *European Journal of Clinical Nutrition*, 48(1), 19–29.
- 754 Fledderus, J. O., van Thienen, J. V., Boon, R. A., Dekker, R. J., Rohlena, J., Volger, O. L.,  
755 Bijnens, A.-P. J. J., Daemen, M. J. A. P., Kuiper, J., van Berkel, T. J. C., Pannekoek, H.,  
756 & Horrevoets, A. J. G. (2007). Prolonged shear stress and KLF2 suppress constitutive

- 757 proinflammatory transcription through inhibition of ATF2. *Blood*, *109*(10), 4249–4257.  
758 <https://doi.org/10.1182/blood-2006-07-036020>
- 759 Frye, B. M., Craft, S., Register, T. C., Andrews, R. N., Appt, S. E., Vitolins, M. Z., Uberseder,  
760 B., Silverstein-Metzler, M. G., Chen, H., Whitlow, C. T., Kim, J., Barcus, R. A.,  
761 Lockhart, S. N., Hoscheidt, S., Say, B. M., Corbitt, S. E., & Shively, C. A. (2020). Diet,  
762 psychosocial stress, and Alzheimer’s disease–related neuroanatomy in female nonhuman  
763 primates. *Alzheimer’s & Dementia*. <https://doi.org/10.1002/alz.12232>
- 764 Gaiteri, C., Ding, Y., French, B., Tseng, G. C., & Sibille, E. (2014). Beyond modules and hubs:  
765 The potential of gene coexpression networks for investigating molecular mechanisms of  
766 complex brain disorders: Beyond modules and hubs. *Genes, Brain and Behavior*, *13*(1),  
767 13–24. <https://doi.org/10.1111/gbb.12106>
- 768 Gibson, G. (2009a). *It Takes a Genome: How a Clash Between Our Genes and Modern Life Is*  
769 *Making Us Sick*. FT Press Science. <http://hdl.handle.net/10822/548498>
- 770 Gibson, G. (2009b). Decanalization and the origin of complex disease. *Nature Reviews Genetics*,  
771 *10*(2), 134–140. <https://doi.org/10.1038/nrg2502>
- 772 Giugliano, D., Ceriello, A., & Esposito, K. (2006). The effects of diet on inflammation:  
773 Emphasis on the metabolic syndrome. *Journal of the American College of Cardiology*,  
774 *48*(4), 677–685. <https://doi.org/10.1016/j.jacc.2006.03.052>
- 775 Goldsworthy, M., Hugill, A., Freeman, H., Horner, E., Shimomura, K., Bogani, D., Pieleś, G.,  
776 Mijat, V., Arkell, R., Bhattacharya, S., Ashcroft, F. M., & Cox, R. D. (2008). Role of the  
777 Transcription Factor Sox4 in Insulin Secretion and Impaired Glucose Tolerance.  
778 *Diabetes*, *57*(8), 2234–2244. <https://doi.org/10.2337/db07-0337>

- 779 Graham, L. C., Harder, J. M., Soto, I., de Vries, W. N., John, S. W. M., & Howell, G. R. (2016).  
780 Chronic consumption of a western diet induces robust glial activation in aging mice and  
781 in a mouse model of Alzheimer's disease. *Scientific Reports*, 6(1).  
782 <https://doi.org/10.1038/srep21568>
- 783 Günthner, R., & Anders, H.-J. (2013). Interferon-Regulatory Factors Determine Macrophage  
784 Phenotype Polarization. *Mediators of Inflammation*, 2013, 1–8.  
785 <https://doi.org/10.1155/2013/731023>
- 786 Han, H., Cho, J.-W., Lee, S., Yun, A., Kim, H., Bae, D., Yang, S., Kim, C. Y., Lee, M., Kim, E.,  
787 Lee, S., Kang, B., Jeong, D., Kim, Y., Jeon, H.-N., Jung, H., Nam, S., Chung, M., Kim,  
788 J.-H., & Lee, I. (2018). TRRUST v2: An expanded reference database of human and  
789 mouse transcriptional regulatory interactions. *Nucleic Acids Research*, 46(D1), D380–  
790 D386. <https://doi.org/10.1093/nar/gkx1013>
- 791 Hanghøj, K., Moltke, I., Andersen, P. A., Manica, A., & Korneliussen, T. S. (2019). Fast and  
792 accurate relatedness estimation from high-throughput sequencing data in the presence of  
793 inbreeding. *GigaScience*, 8(5). <https://doi.org/10.1093/gigascience/giz034>
- 794 Heinz, S., Benner, C., Spann, N., Bertolino, E., Lin, Y. C., Laslo, P., Cheng, J. X., Murre, C.,  
795 Singh, H., & Glass, C. K. (2010). Simple combinations of lineage-determining  
796 transcription factors prime cis-regulatory elements required for macrophage and B cell  
797 identities. *Molecular Cell*, 38(4), 576–589. <https://doi.org/10.1016/j.molcel.2010.05.004>
- 798 Herlaar, E., & Brown, Z. (1999). P38 MAPK signalling cascades in inflammatory disease.  
799 *Molecular Medicine Today*, 5(10), 439–447. <https://doi.org/10.1016/S1357->  
800 4310(99)01544-0



- 801 Hollis, F., Mitchell, E. S., Canto, C., Wang, D., & Sandi, C. (2018). Medium chain triglyceride  
802 diet reduces anxiety-like behaviors and enhances social competitiveness in rats.  
803 *Neuropharmacology*, *138*, 245–256. <https://doi.org/10.1016/j.neuropharm.2018.06.017>
- 804 Holt, E. M., Steffen, L. M., Moran, A., Basu, S., Steinberger, J., Ross, J. A., Hong, C.-P., &  
805 Sinaiko, A. R. (2009). Fruit and vegetable consumption and its relation to markers of  
806 inflammation and oxidative stress in adolescents. *Journal of the American Dietetic*  
807 *Association*, *109*(3), 414–421. <https://doi.org/10.1016/j.jada.2008.11.036>
- 808 Holwerda, S. W., Luehrs, R. E., Gremaud, A. L., Wooldridge, N. A., Stroud, A. K., Fiedorowicz,  
809 J. G., Abboud, F. M., & Pierce, G. L. (2018). Relative burst amplitude of muscle  
810 sympathetic nerve activity is an indicator of altered sympathetic outflow in chronic  
811 anxiety. *Journal of Neurophysiology*, *120*(1), 11–22.  
812 <https://doi.org/10.1152/jn.00064.2018>
- 813 Hu, F. B. (2002). Dietary pattern analysis: A new direction in nutritional epidemiology. *Current*  
814 *Opinion in Lipidology*, *13*(1), 3–9.
- 815 Hu, J. X., Thomas, C. E., & Brunak, S. (2016). Network biology concepts in complex disease  
816 comorbidities. *Nature Reviews Genetics*, *17*(10), 615–629.  
817 <https://doi.org/10.1038/nrg.2016.87>
- 818 Jacka, F. N., Pasco, J. A., Mykletun, A., Williams, L. J., Hodge, A. M., O’Reilly, S. L.,  
819 Nicholson, G. C., Kotowicz, M. A., & Berk, M. (2010). Association of Western and  
820 traditional diets with depression and anxiety in women. *The American Journal of*  
821 *Psychiatry*, *167*(3), 305–311. <https://doi.org/10.1176/appi.ajp.2009.09060881>
- 822 Josh Snodgrass, J. (2013). Health of Indigenous Circumpolar Populations. *Annual Review of*  
823 *Anthropology*, *42*(1), 69–87. <https://doi.org/10.1146/annurev-anthro-092412-155517>

- 824 Jump, D. B., Depner, C. M., Tripathy, S., & Lytle, K. A. (2015). Potential for Dietary  $\omega$ -3 Fatty  
825 Acids to Prevent Nonalcoholic Fatty Liver Disease and Reduce the Risk of Primary Liver  
826 Cancer. *Advances in Nutrition*, 6(6), 694–702. <https://doi.org/10.3945/an.115.009423>
- 827 Juruena, M. F., Eror, F., Cleare, A. J., & Young, A. H. (2020). The Role of Early Life Stress in  
828 HPA Axis and Anxiety. *Advances in Experimental Medicine and Biology*, 1191, 141–  
829 153. [https://doi.org/10.1007/978-981-32-9705-0\\_9](https://doi.org/10.1007/978-981-32-9705-0_9)
- 830 Kafatos, A., Verhagen, H., Moschandreas, J., Apostolaki, I., & Van Westerop, J. J. (2000).  
831 Mediterranean diet of Crete: Foods and nutrient content. *Journal of the American Dietetic*  
832 *Association*, 100(12), 1487–1493. [https://doi.org/10.1016/s0002-8223\(00\)00416-8](https://doi.org/10.1016/s0002-8223(00)00416-8)
- 833 Kanai, M., Akiyama, M., Takahashi, A., Matoba, N., Momozawa, Y., Ikeda, M., Iwata, N.,  
834 Ikegawa, S., Hirata, M., Matsuda, K., Kubo, M., Okada, Y., & Kamatani, Y. (2018).  
835 Genetic analysis of quantitative traits in the Japanese population links cell types to  
836 complex human diseases. *Nature Genetics*, 50(3), 390–400.  
837 <https://doi.org/10.1038/s41588-018-0047-6>
- 838 Kaplan, H., Thompson, R. C., Trumble, B. C., Wann, L. S., Allam, A. H., Beheim, B., Frohlich,  
839 B., Sutherland, M. L., Sutherland, J. D., Stieglitz, J., Rodriguez, D. E., Michalik, D. E.,  
840 Rowan, C. J., Lombardi, G. P., Bedi, R., Garcia, A. R., Min, J. K., Narula, J., Finch, C.  
841 E., ... Thomas, G. S. (2017). Coronary atherosclerosis in indigenous South American  
842 Tsimane: A cross-sectional cohort study. *The Lancet*, 389(10080), 1730–1739.  
843 [https://doi.org/10.1016/S0140-6736\(17\)30752-3](https://doi.org/10.1016/S0140-6736(17)30752-3)
- 844 Kaplan, J. R., Manuck, S. B., & Shively, C. (1991). The effects of fat and cholesterol on social  
845 behavior in monkeys.: *Psychosomatic Medicine*, 53(6), 634–642.  
846 <https://doi.org/10.1097/00006842-199111000-00005>

- 847 Kasprowska-Liškiewicz, D., Liškiewicz, A. D., Nowacka-Chmielewska, M. M., Nowicka, J.,  
848 Małeckki, A., & Barski, J. J. (2017). The ketogenic diet affects the social behavior of  
849 young male rats. *Physiology & Behavior*, *179*, 168–177.  
850 <https://doi.org/10.1016/j.physbeh.2017.06.007>
- 851 Kersey, P. J., Allen, J. E., Allot, A., Barba, M., Boddu, S., Bolt, B. J., Carvalho-Silva, D.,  
852 Christensen, M., Davis, P., Grabmueller, C., Kumar, N., Liu, Z., Maurel, T., Moore, B.,  
853 McDowall, M. D., Maheswari, U., Naamati, G., Newman, V., Ong, C. K., ... Yates, A.  
854 (2018). Ensembl Genomes 2018: An integrated omics infrastructure for non-vertebrate  
855 species. *Nucleic Acids Research*, *46*(D1), D802–D808.  
856 <https://doi.org/10.1093/nar/gkx1011>
- 857 Kim, D., Langmead, B., & Salzberg, S. L. (2015). HISAT: A fast spliced aligner with low  
858 memory requirements. *Nature Methods*, *12*(4), 357–360.  
859 <https://doi.org/10.1038/nmeth.3317>
- 860 Kimmig, L. M., & Karalis, D. G. (2013). Do Omega-3 Polyunsaturated Fatty Acids Prevent  
861 Cardiovascular Disease? A Review of the Randomized Clinical Trials. *Lipid Insights*, *6*,  
862 LPI.S10846. <https://doi.org/10.4137/LPI.S10846>
- 863 Kinsella, R. J., Kähäri, A., Haider, S., Zamora, J., Proctor, G., Spudich, G., Almeida-King, J.,  
864 Staines, D., Derwent, P., Kerhornou, A., Kersey, P., & Flicek, P. (2011). Ensembl  
865 BioMarts: A hub for data retrieval across taxonomic space. *Database: The Journal of*  
866 *Biological Databases and Curation*, *2011*, bar030.  
867 <https://doi.org/10.1093/database/bar030>
- 868 Kougias, D. G., Cortes, L. R., Moody, L., Rhoads, S., Pan, Y.-X., & Juraska, J. M. (2018).  
869 Effects of Perinatal Exposure to Phthalates and a High-Fat Diet on Maternal Behavior

- 870 and Pup Development and Social Play. *Endocrinology*, 159(2), 1088–1105.
- 871 <https://doi.org/10.1210/en.2017-03047>
- 872 Kraft, T. S., Stieglitz, J., Trumble, B. C., Martin, M., Kaplan, H., & Gurven, M. (2018). Nutrition  
873 transition in 2 lowland Bolivian subsistence populations. *The American Journal of*  
874 *Clinical Nutrition*, 108(6), 1183–1195. <https://doi.org/10.1093/ajcn/nqy250>
- 875 Lagranja, E. S., Phojanakong, P., Navarro, A., & Valeggia, C. R. (2015). Indigenous populations  
876 in transition: An evaluation of metabolic syndrome and its associated factors among the  
877 Toba of northern Argentina. *Annals of Human Biology*, 42(1), 84–90.  
878 <https://doi.org/10.3109/03014460.2014.932008>
- 879 Layé, S., Nadjar, A., Joffre, C., & Bazinet, R. P. (2018). Anti-Inflammatory Effects of Omega-3  
880 Fatty Acids in the Brain: Physiological Mechanisms and Relevance to Pharmacology.  
881 *Pharmacological Reviews*, 70(1), 12–38. <https://doi.org/10.1124/pr.117.014092>
- 882 Lê, S., Josse, J., & Husson, F. (2008). **FactoMineR**: An R Package for Multivariate Analysis.  
883 *Journal of Statistical Software*, 25(1). <https://doi.org/10.18637/jss.v025.i01>
- 884 Lea, A. J., Martins, D., Kamau, J., Gurven, M., & Ayroles, J. F. (2020). Urbanization and market  
885 integration have strong, nonlinear effects on cardiometabolic health in the Turkana.  
886 *Science Advances*, 6(43), eabb1430. <https://doi.org/10.1126/sciadv.abb1430>
- 887 Lea, A., Subramaniam, M., Ko, A., Lehtimäki, T., Raitoharju, E., Kähönen, M., Seppälä, I.,  
888 Mononen, N., Raitakari, O. T., Ala-Korpela, M., Pajukanta, P., Zaitlen, N., & Ayroles, J.  
889 F. (2019). Genetic and environmental perturbations lead to regulatory decoherence.  
890 *ELife*, 8. <https://doi.org/10.7554/eLife.40538>
- 891 Li, H., Handsaker, B., Wysoker, A., Fennell, T., Ruan, J., Homer, N., Marth, G., Abecasis, G.,  
892 Durbin, R., & 1000 Genome Project Data Processing Subgroup. (2009). The Sequence

- 893 Alignment/Map format and SAMtools. *Bioinformatics (Oxford, England)*, 25(16), 2078–  
894 2079. <https://doi.org/10.1093/bioinformatics/btp352>
- 895 Liao, Y., Smyth, G. K., & Shi, W. (2014). featureCounts: An efficient general purpose program  
896 for assigning sequence reads to genomic features. *Bioinformatics (Oxford, England)*,  
897 30(7), 923–930. <https://doi.org/10.1093/bioinformatics/btt656>
- 898 Lieberman, D. & Vintage Books (Nowy Jork). (2014). *The story of the human body: Evolution,*  
899 *health and disease*. Vintage Books.
- 900 Lopez-Garcia, E., Schulze, M. B., Fung, T. T., Meigs, J. B., Rifai, N., Manson, J. E., & Hu, F. B.  
901 (2004). Major dietary patterns are related to plasma concentrations of markers of  
902 inflammation and endothelial dysfunction. *The American Journal of Clinical Nutrition*,  
903 80(4), 1029–1035. <https://doi.org/10.1093/ajcn/80.4.1029>
- 904 Mackenbach, J. P. (2007). The Mediterranean diet story illustrates that “why” questions are as  
905 important as “how” questions in disease explanation. *Journal of Clinical Epidemiology*,  
906 60(2), 105–109. <https://doi.org/10.1016/j.jclinepi.2006.05.001>
- 907 Maestriperi, D., Schino, G., Aureli, F., & Troisi, A. (1992). A modest proposal: Displacement  
908 activities as an indicator of emotions in primates. *Animal Behaviour*, 44(5), 967–979.  
909 [https://doi.org/10.1016/S0003-3472\(05\)80592-5](https://doi.org/10.1016/S0003-3472(05)80592-5)
- 910 Maier, S. F., & Watkins, L. R. (1998). Cytokines for psychologists: Implications of bidirectional  
911 immune-to-brain communication for understanding behavior, mood, and cognition.  
912 *Psychological Review*, 105(1), 83–107. <https://doi.org/10.1037/0033-295X.105.1.83>
- 913 Manzel, A., Muller, D. N., Hafler, D. A., Erdman, S. E., Linker, R. A., & Kleinewietfeld, M.  
914 (2014). Role of “Western diet” in inflammatory autoimmune diseases. *Current Allergy*  
915 *and Asthma Reports*, 14(1), 404. <https://doi.org/10.1007/s11882-013-0404-6>

- 916 Martinez, F. O., & Gordon, S. (2014). The M1 and M2 paradigm of macrophage activation:  
917 Time for reassessment. *F1000Prime Reports*, 6. <https://doi.org/10.12703/P6-13>
- 918 Michalson, K. T., Macintyre, A. N., Sempowski, G. D., Bourland, J. D., Howard, T. D.,  
919 Hawkins, G. A., Dugan, G. O., Cline, J. M., & Register, T. C. (2019). Monocyte  
920 Polarization is Altered by Total-Body Irradiation in Male Rhesus Macaques: Implications  
921 for Delayed Effects of Acute Radiation Exposure. *Radiation Research*, 192(2), 121–134.  
922 <https://doi.org/10.1667/RR15310.1>
- 923 Miyata, Y., Fukuhara, A., Otsuki, M., & Shimomura, I. (2012). Expression of Activating  
924 Transcription Factor 2 in Inflammatory Macrophages in Obese Adipose Tissue. *Obesity*.  
925 <https://doi.org/10.1038/oby.2012.154>
- 926 Mosser, D. M., & Edwards, J. P. (2008). Exploring the full spectrum of macrophage activation.  
927 *Nature Reviews Immunology*, 8(12), 958–969. <https://doi.org/10.1038/nri2448>
- 928 Nagpal, R., Shively, C. A., Appt, S. A., Register, T. C., Michalson, K. T., Vitolins, M. Z., &  
929 Yadav, H. (2018). Gut Microbiome Composition in Non-human Primates Consuming a  
930 Western or Mediterranean Diet. *Frontiers in Nutrition*, 5, 28.  
931 <https://doi.org/10.3389/fnut.2018.00028>
- 932 Nahrendorf, M., & Swirski, F. K. (2016). Abandoning M1/M2 for a Network Model of  
933 Macrophage Function. *Circulation Research*, 119(3), 414–417.  
934 <https://doi.org/10.1161/CIRCRESAHA.116.309194>
- 935 Nanri, A., Moore, M. A., & Kono, S. (2007). Impact of C-reactive protein on disease risk and its  
936 relation to dietary factors. *Asian Pacific Journal of Cancer Prevention: APJCP*, 8(2),  
937 167–177.

- 938 Nettleton, J. A., Steffen, L. M., Mayer-Davis, E. J., Jenny, N. S., Jiang, R., Herrington, D. M., &  
939 Jacobs, D. R. (2006). Dietary patterns are associated with biochemical markers of  
940 inflammation and endothelial activation in the Multi-Ethnic Study of Atherosclerosis  
941 (MESA). *The American Journal of Clinical Nutrition*, 83(6), 1369–1379.  
942 <https://doi.org/10.1093/ajcn/83.6.1369>
- 943 Neve, B., Fernandez-Zapico, M. E., Ashkenazi-Katalan, V., Dina, C., Hamid, Y. H., Joly, E.,  
944 Vaillant, E., Benmezroua, Y., Durand, E., Bakaher, N., Delannoy, V., Vaxillaire, M.,  
945 Cook, T., Dallinga-Thie, G. M., Jansen, H., Charles, M.-A., Clément, K., Galan, P.,  
946 Hercberg, S., ... Froguel, P. (2005). Role of transcription factor KLF11 and its diabetes-  
947 associated gene variants in pancreatic beta cell function. *Proceedings of the National*  
948 *Academy of Sciences of the United States of America*, 102(13), 4807–4812.  
949 <https://doi.org/10.1073/pnas.0409177102>
- 950 Ohlow, M. J., Sohre, S., Granold, M., Schreckenberger, M., & Moosmann, B. (2017). Why Have  
951 Clinical Trials of Antioxidants to Prevent Neurodegeneration Failed? - A Cellular  
952 Investigation of Novel Phenothiazine-Type Antioxidants Reveals Competing Objectives  
953 for Pharmaceutical Neuroprotection. *Pharmaceutical Research*, 34(2), 378–393.  
954 <https://doi.org/10.1007/s11095-016-2068-0>
- 955 O’Keefe, J. H., Gheewala, N. M., & O’Keefe, J. O. (2008). Dietary strategies for improving  
956 post-prandial glucose, lipids, inflammation, and cardiovascular health. *Journal of the*  
957 *American College of Cardiology*, 51(3), 249–255.  
958 <https://doi.org/10.1016/j.jacc.2007.10.016>

- 959 Osler, M., & Schroll, M. (1997). Diet and mortality in a cohort of elderly people in a north  
960 European community. *International Journal of Epidemiology*, 26(1), 155–159.  
961 <https://doi.org/10.1093/ije/26.1.155>
- 962 Pearen, M. A., & Muscat, G. E. O. (2010). Minireview: Nuclear Hormone Receptor 4A  
963 Signaling: Implications for Metabolic Disease. *Molecular Endocrinology*, 24(10), 1891–  
964 1903. <https://doi.org/10.1210/me.2010-0015>
- 965 Pontzer, H., Wood, B. M., & Raichlen, D. A. (2018). Hunter-gatherers as models in public  
966 health: Hunter-gatherer health and lifestyle. *Obesity Reviews*, 19, 24–35.  
967 <https://doi.org/10.1111/obr.12785>
- 968 Powles, J., Fahimi, S., Micha, R., Khatibzadeh, S., Shi, P., Ezzati, M., Engell, R. E., Lim, S. S.,  
969 Danaei, G., Mozaffarian, D., & on behalf of the Global Burden of Diseases Nutrition and  
970 Chronic Diseases Expert Group (NutriCoDE). (2013). Global, regional and national  
971 sodium intakes in 1990 and 2010: A systematic analysis of 24 h urinary sodium excretion  
972 and dietary surveys worldwide. *BMJ Open*, 3(12), e003733.  
973 <https://doi.org/10.1136/bmjopen-2013-003733>
- 974 Preacher, K. J., & Hayes, A. F. (2004). SPSS and SAS procedures for estimating indirect effects  
975 in simple mediation models. *Behavior Research Methods, Instruments, & Computers: A  
976 Journal of the Psychonomic Society, Inc*, 36(4), 717–731.  
977 <https://doi.org/10.3758/bf03206553>
- 978 Raison, C. L., Capuron, L., & Miller, A. H. (2006). Cytokines sing the blues: Inflammation and  
979 the pathogenesis of depression. *Trends in Immunology*, 27(1), 24–31.  
980 <https://doi.org/10.1016/j.it.2005.11.006>



- 981 Reimold, A. M., Kim, J., Finberg, R., & Glimcher, L. H. (2001). Decreased immediate  
982 inflammatory gene induction in activating transcription factor-2 mutant mice.  
983 *International Immunology*, *13*(2), 241–248. <https://doi.org/10.1093/intimm/13.2.241>
- 984 Ritchie, M. E., Phipson, B., Wu, D., Hu, Y., Law, C. W., Shi, W., & Smyth, G. K. (2015).  
985 Limma powers differential expression analyses for RNA-sequencing and microarray  
986 studies. *Nucleic Acids Research*, *43*(7), e47. <https://doi.org/10.1093/nar/gkv007>
- 987 Romagnolo, D. F., & Selmin, O. I. (2017). Mediterranean Diet and Prevention of Chronic  
988 Diseases. *Nutrition Today*, *52*(5), 208–222.  
989 <https://doi.org/10.1097/NT.0000000000000228>
- 990 Samson, S., & Wong, N. (2002). Role of Sp1 in insulin regulation of gene expression. *Journal of*  
991 *Molecular Endocrinology*, *29*(3), 265–279. <https://doi.org/10.1677/jme.0.0290265>
- 992 Schino, G., Perretta, G., Taglioni, A. M., Monaco, V., & Troisi, A. (1996). Primate displacement  
993 activities as an ethopharmacological model of anxiety. *Anxiety*, *2*(4), 186–191.  
994 [https://doi.org/10.1002/\(SICI\)1522-7154\(1996\)2:4<186::AID-ANXI5>3.0.CO;2-M](https://doi.org/10.1002/(SICI)1522-7154(1996)2:4<186::AID-ANXI5>3.0.CO;2-M)
- 995 Schmidl, C., Renner, K., Peter, K., Eder, R., Lassmann, T., Balwierz, P. J., Itoh, M., Nagao-Sato,  
996 S., Kawaji, H., Carninci, P., Suzuki, H., Hayashizaki, Y., Andreessen, R., Hume, D. A.,  
997 Hoffmann, P., Forrest, A. R. R., Kreutz, M. P., Edinger, M., Rehli, M., & FANTOM  
998 consortium. (2014). Transcription and enhancer profiling in human monocyte subsets.  
999 *Blood*, *123*(17), e90-99. <https://doi.org/10.1182/blood-2013-02-484188>
- 1000 Schuler, A., Schwieger, M., Engelmann, A., Weber, K., Horn, S., Muller, U., Arnold, M. A.,  
1001 Olson, E. N., & Stocking, C. (2008). The MADS transcription factor Mef2c is a pivotal  
1002 modulator of myeloid cell fate. *Blood*, *111*(9), 4532–4541. [https://doi.org/10.1182/blood-](https://doi.org/10.1182/blood-2007-10-116343)  
1003 [2007-10-116343](https://doi.org/10.1182/blood-2007-10-116343)

- 1004 Scott, E., Simon, M., Anastasi, J., & Singh, H. (1994). Requirement of transcription factor PU.1  
1005 in the development of multiple hematopoietic lineages. *Science*, *265*(5178), 1573–1577.  
1006 <https://doi.org/10.1126/science.8079170>
- 1007 Seltmann, M. W., Helle, S., Adams, M. J., Mar, K. U., & Lahdenperä, M. (2018). Evaluating the  
1008 personality structure of semi-captive Asian elephants living in their natural habitat. *Royal*  
1009 *Society Open Science*, *5*(2), 172026. <https://doi.org/10.1098/rsos.172026>
- 1010 Shively, C. A. (1998). Social subordination stress, behavior, and central monoaminergic function  
1011 in female cynomolgus monkeys. *Biological Psychiatry*, *44*(9), 882–891.
- 1012 Shively, Carol A., Appt, S. E., Chen, H., Day, S. M., Frye, B. M., Shaltout, H. A., Silverstein-  
1013 Metzler, M. G., Snyder-Mackler, N., Uberseder, B., Vitolins, M. Z., & Register, T. C.  
1014 (2020). Mediterranean diet, stress resilience, and aging in nonhuman primates.  
1015 *Neurobiology of Stress*, *13*, 100254. <https://doi.org/10.1016/j.ynstr.2020.100254>
- 1016 Shively, Carol A., Appt, S. E., Vitolins, M. Z., Uberseder, B., Michalson, K. T., Silverstein-  
1017 Metzler, M. G., & Register, T. C. (2019). Mediterranean versus Western Diet Effects on  
1018 Caloric Intake, Obesity, Metabolism, and Hepatosteatosis in Nonhuman Primates.  
1019 *Obesity (Silver Spring, Md.)*, *27*(5), 777–784. <https://doi.org/10.1002/oby.22436>
- 1020 Shively, Carol A., Register, T. C., Appt, S. E., & Clarkson, T. B. (2015). Effects of long-term  
1021 sertraline treatment and depression on coronary artery atherosclerosis in premenopausal  
1022 female primates. *Psychosomatic Medicine*, *77*(3), 267–278.  
1023 <https://doi.org/10.1097/PSY.0000000000000163>
- 1024 Shively, Carol A., Register, T. C., & Clarkson, T. B. (2009). Social Stress, Visceral Obesity, and  
1025 Coronary Artery Atherosclerosis in Female Primates. *Obesity*, *17*(8), 1513–1520.  
1026 <https://doi.org/10.1038/oby.2009.74>

- 1027 Simopoulos, A. P. (2006). Evolutionary aspects of diet, the omega-6/omega-3 ratio and genetic  
1028 variation: Nutritional implications for chronic diseases. *Biomedicine & Pharmacotherapy*  
1029 = *Biomedecine & Pharmacotherapie*, 60(9), 502–507.  
1030 <https://doi.org/10.1016/j.biopha.2006.07.080>
- 1031 Smil, V. (1989). Coronary Heart Disease, Diet, and Western Mortality. *Population and*  
1032 *Development Review*, 15(3), 399. <https://doi.org/10.2307/1972440>
- 1033 Smyth, S., & Heron, A. (2006). Diabetes and obesity: The twin epidemics. *Nature Medicine*,  
1034 12(1), 75–80. <https://doi.org/10.1038/nm0106-75>
- 1035 Snyder-Mackler, N., & Lea, A. J. (2018). Functional genomic insights into the environmental  
1036 determinants of mammalian fitness. *Current Opinion in Genetics & Development*, 53,  
1037 105–112. <https://doi.org/10.1016/j.gde.2018.08.001>
- 1038 Snyder-Mackler, N., Sanz, J., Kohn, J. N., Brinkworth, J. F., Morrow, S., Shaver, A. O., Grenier,  
1039 J.-C., Pique-Regi, R., Johnson, Z. P., Wilson, M. E., Barreiro, L. B., & Tung, J. (2016).  
1040 Social status alters immune regulation and response to infection in macaques. *Science*,  
1041 354(6315), 1041–1045. <https://doi.org/10.1126/science.aah3580>
- 1042 Solomon, S. S., Majumdar, G., Martinez-Hernandez, A., & Raghov, R. (2008). A critical role of  
1043 Sp1 transcription factor in regulating gene expression in response to insulin and other  
1044 hormones. *Life Sciences*, 83(9–10), 305–312. <https://doi.org/10.1016/j.lfs.2008.06.024>
- 1045 Stearns, S. C., & Koella, J. C. (Eds.). (2008). *Evolution in health and disease* (2nd ed). Oxford  
1046 University Press.
- 1047 Steinhubl, S. R. (2008). Why Have Antioxidants Failed in Clinical Trials? *The American Journal*  
1048 *of Cardiology*, 101(10), S14–S19. <https://doi.org/10.1016/j.amjcard.2008.02.003>

- 1049 Stice, E., & Durant, S. (2014). Elevated objectively measured but not self-reported energy intake  
1050 predicts future weight gain in adolescents. *Appetite*, *81*, 84–88.  
1051 <https://doi.org/10.1016/j.appet.2014.06.012>
- 1052 Suchanek, P., Poledne, R., & Hubacek, J. A. (2011). Dietary intake reports fidelity—Fact or  
1053 fiction? *Neuro Endocrinology Letters*, *32 Suppl 2*, 29–31.
- 1054 Tachmazidou, I., Süveges, D., Min, J. L., Ritchie, G. R. S., Steinberg, J., Walter, K., Iotchkova,  
1055 V., Schwartzentruber, J., Huang, J., Memari, Y., McCarthy, S., Crawford, A. A.,  
1056 Bombieri, C., Cocca, M., Farmaki, A.-E., Gaunt, T. R., Jousilahti, P., Kooijman, M. N.,  
1057 Lehne, B., ... Zeggini, E. (2017). Whole-Genome Sequencing Coupled to Imputation  
1058 Discovers Genetic Signals for Anthropometric Traits. *The American Journal of Human*  
1059 *Genetics*, *100*(6), 865–884. <https://doi.org/10.1016/j.ajhg.2017.04.014>
- 1060 Thompson, J. R., Gustafsson, H. C., DeCapo, M., Takahashi, D. L., Bagley, J. L., Dean, T. A.,  
1061 Kievit, P., Fair, D. A., & Sullivan, E. L. (2018). Maternal Diet, Metabolic State, and  
1062 Inflammatory Response Exert Unique and Long-Lasting Influences on Offspring  
1063 Behavior in Non-Human Primates. *Frontiers in Endocrinology*, *9*.  
1064 <https://doi.org/10.3389/fendo.2018.00161>
- 1065 Trichopoulou, A., Kouris-Blazos, A., Wahlqvist, M. L., Gnardellis, C., Lagiou, P.,  
1066 Polychronopoulos, E., Vassilakou, T., Lipworth, L., & Trichopoulos, D. (1995). Diet and  
1067 overall survival in elderly people. *BMJ (Clinical Research Ed.)*, *311*(7018), 1457–1460.  
1068 <https://doi.org/10.1136/bmj.311.7018.1457>
- 1069 Troisi, A., Belsanti, S., Bucci, A. R., Mosco, C., Sinti, F., & Verucci, M. (2000). Affect  
1070 regulation in alexithymia: An ethological study of displacement behavior during

- 1071 psychiatric interviews. *The Journal of Nervous and Mental Disease*, 188(1), 13–18.
- 1072 <https://doi.org/10.1097/00005053-200001000-00003>
- 1073 Troisi, Alfonso. (2002). Displacement activities as a behavioral measure of stress in nonhuman  
1074 primates and human subjects. *Stress (Amsterdam, Netherlands)*, 5(1), 47–54.
- 1075 <https://doi.org/10.1080/102538902900012378>
- 1076 Tung, J., & Gilad, Y. (2013). Social environmental effects on gene regulation. *Cellular and*  
1077 *Molecular Life Sciences: CMLS*, 70(22), 4323–4339. [https://doi.org/10.1007/s00018-013-](https://doi.org/10.1007/s00018-013-1357-6)  
1078 [1357-6](https://doi.org/10.1007/s00018-013-1357-6)
- 1079 Warden, C. H., & Fisler, J. S. (2008). Comparisons of Diets Used in Animal Models of High-Fat  
1080 Feeding. *Cell Metabolism*, 7(4), 277. <https://doi.org/10.1016/j.cmet.2008.03.014>
- 1081 Whelton, P. K., Appel, L., Charleston, J., Dalcin, A. T., Ewart, C., Fried, L., Kaidy, D., Klag, M.  
1082 J., Kumanyika, S., Steffen, L., Walker, W. G., Oberman, A., Counts, K., Hataway, H.,  
1083 Raczynski, J., Rappaport, N., Weinsier, R., Borhani, N. O., Bernauer, E., ... Blethen, E.  
1084 (1992). The Effects of Nonpharmacologic Interventions on Blood Pressure of Persons  
1085 With High Normal Levels: Results of the Trials of Hypertension Prevention, Phase I.  
1086 *JAMA*, 267(9), 1213–1220. <https://doi.org/10.1001/jama.1992.03480090061028>
- 1087 Wolf, S. A., Boddeke, H. W. G. M., & Kettenmann, H. (2017). Microglia in Physiology and  
1088 Disease. *Annual Review of Physiology*, 79(1), 619–643. [https://doi.org/10.1146/annurev-](https://doi.org/10.1146/annurev-physiol-022516-034406)  
1089 [physiol-022516-034406](https://doi.org/10.1146/annurev-physiol-022516-034406)
- 1090 Yang, H., Graham, L. C., Reagan, A. M., Grabowska, W. A., Schott, W. H., & Howell, G. R.  
1091 (2019). Transcriptome profiling of brain myeloid cells revealed activation of Itgal,  
1092 Trem1, and Spp1 in western diet-induced obesity. *Journal of Neuroinflammation*, 16(1).  
1093 <https://doi.org/10.1186/s12974-019-1527-z>

1094 Zhang, D. E., Hetherington, C. J., Tan, S., Dziennis, S. E., Gonzalez, D. A., Chen, H. M., &  
1095 Tenen, D. G. (1994). Sp1 is a critical factor for the monocytic specific expression of  
1096 human CD14. *The Journal of Biological Chemistry*, 269(15), 11425–11434.

1097

1098

1099 **Acknowledgments:** We thank Beth Uberseder, Maryanne Post, JD Bottoms, Edison Floyd,  
1100 Jason Lucas, Joshua Long, Diane Wood, and Sherri Samples for technical support. We thank  
1101 Nicholas Lozier, Tiffany Pan, Marina Watowich, and Jenny Tung for their helpful feedback on  
1102 previous versions of this manuscript.

1103

1104 **Funding:** This work was funded by R01HL087103 (CAS), R01HL122393 (TCR),  
1105 U24DK097748 (TCR) from NIH and intramural funding from the Department of Pathology,  
1106 Wake Forest School of Medicine (CAS). NSM was supported by R00AG051764 and  
1107 R01AG060931 from NIH, and AJL was supported by a postdoctoral fellowship from the Helen  
1108 Hay Whitney Foundation. The Wake Forest Comprehensive Cancer Center Cancer Genomics  
1109 Shared Resource is supported by P30CA012197 and by a NIH Shared Instrumentation Grant  
1110 S10OD023409 to GAH.

1111

1112 **Author Contributions:** Conceptualization, C.A.S. and T.C.R.; Methodology, C.A.S., T.C.R.,  
1113 N.S.-M., and C.S.C.J.; Formal Analysis – C.A.S., T.C.R., N.S.-M., A.J.L., and C.S.C.J;  
1114 Investigation, M.E., A.N.V., N.A.V., S.C.P., and S.Y.W.; Writing – Original Draft, C.A.S.,  
1115 T.C.R., N.S.-M., and C.S.C.J.; Writing – Review & Editing, all authors; Visualization – N.S.-M.,  
1116 A.J.L., and C.S.C.J; Funding Acquisition, C.A.S. and T.C.R.; Supervision, C.A.S., T.C.R., and

1117 N.S.-M.

1118

1119 **Competing Interests:** The authors declare no competing interests.

1120

1121 **Data Availability**

1122 All data and code used to complete these analyses can be found at

1123 [https://github.com/cscjohns/diet\\_behavior\\_immunity](https://github.com/cscjohns/diet_behavior_immunity). The raw data can be accessed from the

1124 gene expression omnibus repository from accession # GSE144314.
